# Supplementary material for: Synthesis of isothiocyanato alkyl sulfides from alkenes using KSCN and DMTSM
Source: Royal Society of Chemistry journal article supplement (doi:10.1039/d4ob00487f), 2024-01-01

## Supporting Information

### Synthesis of Isothiocyanato Alkyl Sulfides from Alkenes Using KSCN and DMTSM

Shixuan Jiang,<sup>a,†</sup> Daijiao Zhuang,<sup>a,†</sup> Peihua Liu,<sup>b</sup> Qiyang Xu,<sup>a</sup> Xiaofeng Luo,<sup>c</sup>  
Tianqiang Wang,<sup>c</sup> Chengcheng Zhang<sup>a</sup> and Rulong Yan<sup>a\*</sup>

<sup>a</sup> State Key Laboratory of Applied Organic Chemistry, College of Chemistry and  
Chemical Engineering, Lanzhou University, Lanzhou 73000, Gansu, China.

<sup>b</sup> Research Institute of Oil and Gas Technology of Changqing Oilfield Company, Xian  
710018, Shanxi, China.

<sup>c</sup> Chengdu Guibao Science and Technology Co., Ltd, Chengdu 610041 Sichuan,  
China.

E-mail: yanrl@lzu.edu.cn; Fax: +81-931-8912596.

### Table of Contents

|                         |         |
|-------------------------|---------|
| General Remark          | S2      |
| Experimental Procedures | S2-S5   |
| The Data of Products    | S6-S14  |
| Reference               | S15     |
| NMR spectra             | S16-S46 |

## General remark

NMR spectra of materials and products were recorded on 300 MHz and 75 MHz (VARIAN 300 M), 400 MHz and 100 MHz (BRUKER 400 M or JNM-ECS 400 M), 600 MHz and 150 MHz (BRUKER 600 M). Corresponding solvents were CDCl<sub>3</sub>. All chemical shifts are given as  $\delta$  value (ppm) with reference to tetramethylsilane (TMS) as an internal standard. All compounds were further characterized by HRMS; copies of <sup>1</sup>H NMR, <sup>13</sup>C NMR, and <sup>19</sup>F NMR spectra were provided. Products were purified by flash chromatography on 200-300 mesh silica gels. All melting points were determined without correction. All reactions were carried out under air in oven-dried glassware, unless otherwise noted. Commercially available reagents and solvents were used without further purification, unless otherwise noted.

## Experimental Procedures

### General procedure for the synthesis of dimethyl(methylthio)sulfonium trifluoromethanesulfonate<sup>1</sup> (DMTSM)

At 0 °C, Me<sub>2</sub>S<sub>2</sub> (0.1 mol, 1.0 equiv.) was added dropwise to a solution of methyl trifluoromethanesulfonate (0.12 mol, 1.2 equiv.) in CH<sub>2</sub>Cl<sub>2</sub> (100 mL) in 30 min. The mixture was stirred for 1 h at that temperature, following by 18 h at room temperature. Upon completion, the mixture was cooled to -15 °C with a freezer to afford white solid. The precipitation was collected by filtration and washed with fresh distilled Et<sub>2</sub>O under nitrogen atmosphere, yielding dimethyl(methylthio)sulfonium trifluoromethanesulfonate (23.1 g, 90%) as a white solid. <sup>1</sup>H NMR (400 MHz, CDCl<sub>3</sub>, ppm) :  $\delta$ = 3.21 (s, 6 H) 2.84 (s, 3H); <sup>13</sup>C NMR (100 MHz, CDCl<sub>3</sub>, ppm):  $\delta$ = <sup>13</sup>C NMR (101 MHz, )  $\delta$  121.7, 118.6, 30.9, 17.0.

### General procedure for the synthesis of isothiocyanatoalkyl methyl sulfides:

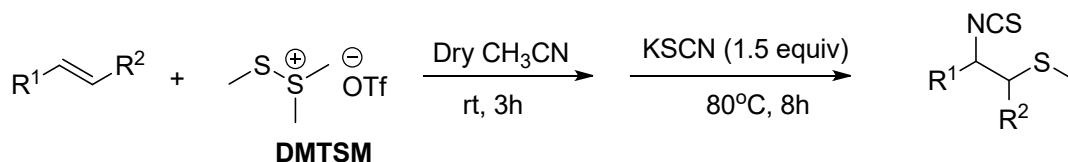

The alkenes (0.5 mmol, 1.0 equiv.) and DMTSM (0.6 mmol, 1.2 equiv.) were mixed in dry CH<sub>3</sub>CN (5 mL). This mixture was carried out under air conditions at room temperature in sealed tube and the reaction time was monitored by TLC. After 3 h of reaction, the raw material alkenes had completely reacted. Subsequently, 1.5 equiv. KSCN was introduced and the reaction was elevated to 80°C. Following TLC analysis at 8 h, it was observed that there was no further change in the quantities of starting materials and products, prompting the cessation of the reaction. The reaction mixture was quenched with water and extracted with ethyl acetate 3 times. The organic layers were combined and washed with saturated NaCl (aq.). Then the organic layer dried with anhydrous Na<sub>2</sub>SO<sub>4</sub>. The solvent was evaporated in vacuo and the crude product was purified by column chromatography, eluting with petroleum ether/ ethyl acetate (10:1) to afford the desired products.

### Large-scale preparation of 3a and its derivatization:

#### (a) Large-scale preparation of 3a

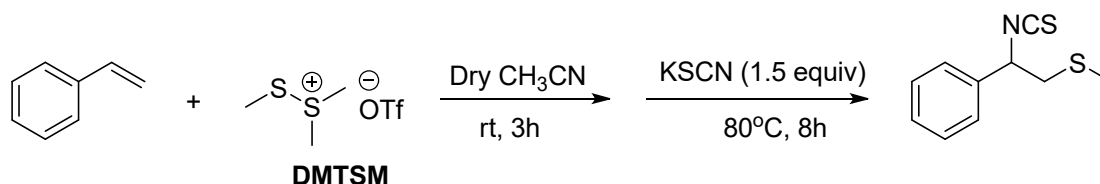

**1a** (10.0 mmol, 1.0 equiv.) and DMTSM (12.0 mmol, 1.2 equiv.) were mixed in dry CH<sub>3</sub>CN (10 mL) under air conditions at room temperature for 3 h in sealed tube. Subsequently, 1.5 equiv. of KSCN was introduced, and the reaction was elevated to 80°C for 8 h. Then the reaction mixture was quenched with water and extracted with ethyl acetate 3 times. The organic layers were combined and washed with saturated NaCl (aq.). Then the organic layer dried with anhydrous Na<sub>2</sub>SO<sub>4</sub>. The solvent was evaporated in vacuo and the crude product was purified by column chromatography, eluting with petroleum ether/ ethyl acetate (10:1) to afford **3a** (1.36 g, 65% yield).

**(b) General procedure for the synthesis of compound 5<sup>2</sup>**

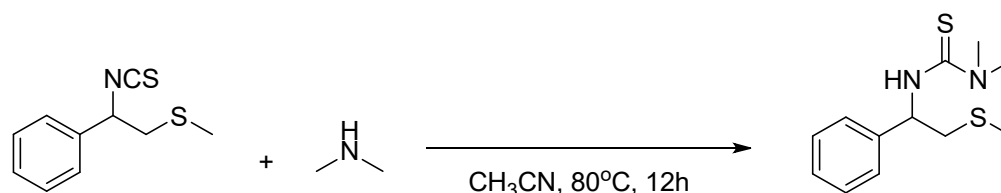

To an oven-dried test tube with standard ground joint equipped with a magnetic stirring bar was charged with **3a** (1.0 mmol, 1.0 equiv.), dimethylamine (1.2 mmol, 1.2 equiv.) in CH<sub>3</sub>CN (4 mL) at 80 °C for 12 h. After the reaction was finished, saturated NaCl (aq.) was added and the mixture was extracted with ethyl acetate. The organic layer was dried over anhydrous Na<sub>2</sub>SO<sub>4</sub> and evaporated under vacuum. The residue was purified by flash column chromatography, eluting with petroleum ether/ethyl acetate to afford the desired product **5** (213.4 mg, Yellow oil, 84% yield). <sup>1</sup>H NMR (400 MHz, CDCl<sub>3</sub>, ppm) : δ= 7.26 (d, *J*= 4.4 Hz, 4 H), 7.17-7.20 (m, 1 H), 6.03 (d, *J*= 6.8 Hz, 1 H), 5.74-5.78 (m, 1 H), 3.22 (s, 6 H) 2.92-3.05 (m, 2 H), 1.92 (s, 3 H); <sup>13</sup>C NMR (100 MHz, CDCl<sub>3</sub>, ppm): δ= <sup>13</sup>C NMR (101 MHz, ) δ 181.2, 140.9, 128.5, 127.4, 126.4, 57.3, 40.4, 40.3, 15.9; HRMS calcd for C<sub>12</sub>H<sub>18</sub>N<sub>2</sub>S<sub>2</sub> [M+H]<sup>+</sup> 255.0984; found: 255.0979.

**(c) General procedure for the synthesis of compound 6<sup>3</sup>**

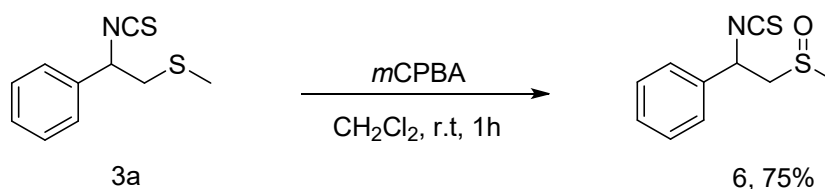

At -78 °C, to a solution of **3a** (1.0 mmol, 1.0 equiv.) in dichloromethane (10 mL) was added dropwise a solution of *m*CPBA (1.0 mmol, 1.0 equiv.) in dichloromethane (5 mL). After 1 h stirring at that temperature, dichloromethane and saturated aqueous aq. NaHCO<sub>3</sub> were added, the layers were separated and the aqueous layer was extracted with dichloromethane. The combined organic layers were dried over sodium sulfate, filtered and concentrated. The crude was purified by flash column chromatography to afford the desired product **6** (168.8 mg, Yellow oil, 75% yield). <sup>1</sup>H NMR (400 MHz, CDCl<sub>3</sub>, ppm) : δ= 7.30-7.40 (m, 5 H), 5.30-5.34 (m, 1 H), 3.53-3.59

(m, 1 H), 3.20-3.25 (m, 1 H), 2.89 (s, 3 H);  $^{13}\text{C}$  NMR (100 MHz,  $\text{CDCl}_3$ , ppm):  $\delta$ =  $^{13}\text{C}$   
NMR (101 MHz, )  $\delta$ = 138.1, 136.6, 129.6, 129.43, 126.1, 125.9, 61.4, 56.6, 42.3;  
HRMS calcd for  $\text{C}_{10}\text{H}_{11}\text{NOS}_2$   $[\text{M}+\text{H}]^+$  226.0355; found: 226.0355.

## The Data of Products:

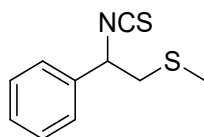

### (2-isothiocyanato-2-phenylethyl)(methyl)sulfane (3a)

Yellow oil (76.3 mg, 73% yield).  $^1\text{H}$  NMR (400 MHz,  $\text{CDCl}_3$ , ppm)  $\delta$ = 7.25-7.34 (m, 5 H), 4.81- 4.85 (t, 1 H), 2.83-2.95 (m, 2 H), 2.01 (s, 3 H);  $^{13}\text{C}$  NMR (100 MHz,  $\text{CDCl}_3$ , ppm)  $\delta$ = 137.8, 134.5, 128.9, 128.6, 126.1, 61.9, 43.1, 16.4; HRMS calcd for  $\text{C}_{10}\text{H}_{11}\text{NS}_2$   $[\text{M}+\text{H}]^+$  210.0406; found: 210.0406.

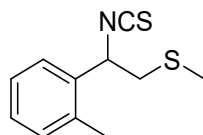

### (2-isothiocyanato-2-(*o*-tolyl)ethyl)(methyl)sulfane (3b)

Yellow oil (97.0 mg, 87% yield).  $^1\text{H}$  NMR (400 MHz,  $\text{CDCl}_3$ , ppm) :  $\delta$ = 7.42 (d,  $J$ = 7.2 Hz, 1 H), 7.23-7.28 (m, 2 H), 7.16 (d,  $J$ = 7.6 Hz, 1 H), 5.15-5.18 (t, 1 H), 2.89-2.97 (m, 2 H), 2.35 (s, 3 H), 2.14 (s, 3 H);  $^{13}\text{C}$  NMR (100 MHz,  $\text{CDCl}_3$ , ppm):  $\delta$ = 135.9, 134.1, 133.7, 130.8, 128.5, 126.7, 125.9, 58.7, 41.9, 19.1, 16.4; HRMS calcd for  $\text{C}_{11}\text{H}_{13}\text{NS}_2$   $[\text{M}+\text{H}]^+$  224.0562; found: 224.0559.

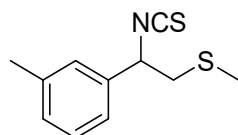

### (2-isothiocyanato-2-(*m*-tolyl)ethyl)(methyl)sulfane (3c)

Yellow oil (85.8 mg, 77% yield).  $^1\text{H}$  NMR (400 MHz,  $\text{CDCl}_3$ , ppm) :  $\delta$ = 7.25-7.29 (t, 1 H), 7.11-7.18 (m, 3 H), 4.85-4.88 (t, 1 H), 2.89-3.01 (m, 2 H), 2.37 (s, 3 H), 2.11 (s, 3 H);  $^{13}\text{C}$  NMR (100 MHz,  $\text{CDCl}_3$ , ppm):  $\delta$ =138.7, 137.7, 134.2, 129.6, 128.6, 126.5, 122.9, 61.7, 43.1, 21.5, 16.4; HRMS calcd for  $\text{C}_{11}\text{H}_{13}\text{NS}_2$   $[\text{M}+\text{H}]^+$  224.0562; found: 224.0561.

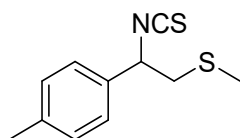

**(2-isothiocyanato-2-(*p*-tolyl)ethyl)(methyl)sulfane (3d)**

Yellow oil (88.2 mg, 79% yield). <sup>1</sup>H NMR (400 MHz, CDCl<sub>3</sub>, ppm) : δ= 7.10-7.18 (m, 4 H), 4.79-4.81(t, 1 H), 2.82-2.90 (m, 2 H), 2.28 (s, 3 H), 2.02 (s, 3 H); <sup>13</sup>C NMR (100 MHz, CDCl<sub>3</sub>, ppm): δ= 138.5, 134.8, 134.1, 129.5, 125.9, 61.6, 43.1, 21.1, 16.4; HRMS calcd for C<sub>11</sub>H<sub>13</sub>NS<sub>2</sub> [M+H]<sup>+</sup> 224.0562; found: 224.0560.

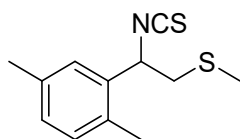

**(2-(2,5-dimethylphenyl)-2-isothiocyanatoethyl)(methyl)sulfane (3e)**

Colourless oil (104.3 mg, 88% yield). <sup>1</sup>H NMR (400 MHz, CDCl<sub>3</sub>, ppm) : δ= 7.21 (s, 1 H), 7.04 (s, 2 H), 5.11-5.15 (t, 1 H), 2.87-2.96 (m, 2 H), 2.34 (s, 3 H), 2.29 (s, 3 H), 2.15 (s, 3 H); <sup>13</sup>C NMR (100 MHz, CDCl<sub>3</sub>, ppm): δ= 136.3, 135.6, 133.5, 130.9, 129.2, 126.4, 58.6, 41.9, 21.1, 18.5, 16.4; HRMS calcd for C<sub>12</sub>H<sub>15</sub>NS<sub>2</sub> [M+H]<sup>+</sup> 238.0719; found: 238.0709.

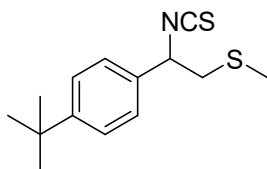

**(2-(4-(tert-butyl)phenyl)-2-isothiocyanatoethyl)(methyl)sulfane (3f)**

Yellow oil (118.0 mg, 89% yield). <sup>1</sup>H NMR (400 MHz, CDCl<sub>3</sub>, ppm) δ= 7.33 (d, *J*= 7.6 Hz, 2 H), 7.18 (d, *J*= 8 Hz, 2 H), 4.80-4.83 (t, 1 H), 2.82-2.94(m, 2 H), 2.04 (s, 3 H), 1.24 (s, 9 H); <sup>13</sup>C NMR (100 MHz, CDCl<sub>3</sub>, ppm) δ= 151.8, 134.8, 125.8, 125.8, 61.6, 43.1, 34.6, 31.2, 16.4; HRMS calcd for C<sub>14</sub>H<sub>19</sub>NS<sub>2</sub> [M+H]<sup>+</sup> 266.1032; found: 266.1034.

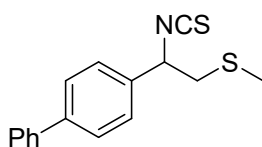

**(2-([1,1'-biphenyl]-4-yl)-2-isothiocyanatoethyl)(methyl)sulfane (3g)**

Yellow oil (122.5 mg, 86% yield).  $^1\text{H}$  NMR (400 MHz,  $\text{CDCl}_3$ , ppm) :  $\delta$ = 7.56-7.61 (m, 4 H), 7.34-7.46 (m, 5 H), 4.93-4.96 (t, 1 H), 2.93-3.04 (m, 2 H), 2.11 (s, 3 H);  $^{13}\text{C}$  NMR (100 MHz,  $\text{CDCl}_3$ , ppm):  $\delta$ = 141.6, 140.1, 136.7, 134.5, 128.9, 128.7, 127.7, 127.6, 127.5, 127.1, 126.9, 126.6, 126.4, 61.4, 43.1, 16.5; HRMS calcd for  $\text{C}_{16}\text{H}_{15}\text{NS}_2$   $[\text{M}+\text{H}]^+$  286.0719; found: 286.0716.

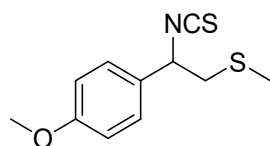

**(2-isothiocyanato-2-(4-methoxyphenyl)ethyl)(methyl)sulfane (3h)**

Colourless oil (83.7 mg, 70% yield).  $^1\text{H}$  NMR (400 MHz,  $\text{CDCl}_3$ , ppm) :  $\delta$ = 7.25 (d,  $J$ = 8.4 Hz, 2 H), 6.91 (d,  $J$ = 8.8 Hz, 2 H), 4.83-4.87 (t, 1 H), 3.81 (s, 3 H), 2.88-3.02 (m, 2 H), 2.09 (s, 3 H);  $^{13}\text{C}$  NMR (100 MHz,  $\text{CDCl}_3$ , ppm):  $\delta$ =159.7, 134.1, 129.9, 127.4, 127.3, 114.3, 114.2, 61.5, 55.4, 43.1, 16.4; HRMS calcd for  $\text{C}_{11}\text{H}_{13}\text{NOS}_2$   $[\text{M}+\text{H}]^+$  240.0511; found: 240.0513.

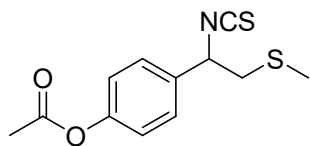

**4-(1-isothiocyanato-2-(methylthio)ethyl)phenyl acetate (3i)**

Colourless oil (100.2 mg, 75% yield).  $^1\text{H}$  NMR (400 MHz,  $\text{CDCl}_3$ , ppm) :  $\delta$ = 7.25-7.28 (m, 2 H), 7.03-7.06 (m, 2 H), 4.82-4.86 (t, 1 H), 2.80-2.92 (m, 2 H), 2.22 (s, 3 H), 2.02 (s, 3 H);  $^{13}\text{C}$  NMR (100 MHz,  $\text{CDCl}_3$ , ppm):  $\delta$ = 169.1, 150.6, 135.2, 134.7, 127.2, 122.0, 61.2, 43.1, 21.0, 16.4; HRMS calcd for  $\text{C}_{12}\text{H}_{13}\text{NO}_2\text{S}_2$   $[\text{M}+\text{H}]^+$  268.0460; found: 268.0459.

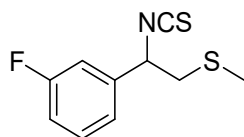

**(2-(3-fluorophenyl)-2-isothiocyanatoethyl)(methyl)sulfane (3j)**

Yellow oil (73.8 mg, 65% yield).  $^1\text{H}$  NMR (400 MHz,  $\text{CDCl}_3$ , ppm) :  $\delta$ = 7.26-7.32 (m, 1 H), 6.97-7.06 (m, 3 H), 4.83-4.86 (m, 3 H), 2.86-2.90 (m, 2 H), 2.03 (s, 3 H);  $^{13}\text{C}$  NMR (100 MHz,  $\text{CDCl}_3$ , ppm):  $\delta$ = 162.8 (d,  $J$ = 247 Hz), 140.3 (d,  $J$ = 7.2 Hz), 135.5,



130.6 (d,  $J = 8.2$  Hz), 121.8, 115.6 (d,  $J = 20.1$  Hz), 113.3 (d,  $J = 22.6$  Hz), 61.3, 43.1, 16.5;  $^{19}\text{F}$  NMR (377 MHz,  $\text{CDCl}_3$ , ppm):  $\delta = -111.3$ ; HRMS calcd for  $\text{C}_{10}\text{H}_{10}\text{FNS}_2$   $[\text{M}+\text{H}]^+$  228.0311; found: 228.0313.

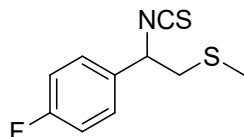

**(2-(4-fluorophenyl)-2-isothiocyanatoethyl)(methyl)sulfane (3k)**

Yellow oil (76.0 mg, 67% yield).  $^1\text{H}$  NMR (400 MHz,  $\text{CDCl}_3$ , ppm):  $\delta = 7.23\text{--}7.26$  (m, 2 H), 7.00–7.04 (m, 2 H), 4.81–4.85 (t, 1 H), 2.82–2.95 (m, 2 H), 2.02 (s, 3 H);  $^{13}\text{C}$  NMR (100 MHz,  $\text{CDCl}_3$ , ppm):  $\delta = 163.9, 161.5, 133.73, 127.9$  (d,  $J = 6.3$  Hz), 115.9 (d,  $J = 21.7$  Hz), 61.20, 43.20, 16.49.  $^{19}\text{F}$  NMR (377 MHz,  $\text{CDCl}_3$ , ppm):  $\delta = -112.7$ ; HRMS calcd for  $\text{C}_{10}\text{H}_{10}\text{FNS}_2$   $[\text{M}+\text{H}]^+$  228.0311; found: 228.0312.

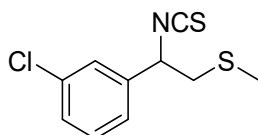

**(2-(3-chlorophenyl)-2-isothiocyanatoethyl)(methyl)sulfane (3l)**

Yellow oil (82.7 mg, 68% yield).  $^1\text{H}$  NMR (400 MHz,  $\text{CDCl}_3$ , ppm):  $\delta = 7.25\text{--}7.27$  (t, 3 H), 7.16–7.17 (m, 1 H), 4.81–4.85 (t, 1 H), 2.89–2.91 (m, 2 H), 2.04 (s, 3 H);  $^{13}\text{C}$  NMR (100 MHz,  $\text{CDCl}_3$ , ppm):  $\delta = 139.8, 134.8, 130.2, 128.8, 126.4, 124.3, 61.2, 43.1, 16.5$ ; HRMS calcd for  $\text{C}_{10}\text{H}_{10}\text{ClNS}_2$   $[\text{M}+\text{H}]^+$  244.0016; found: 244.0017.

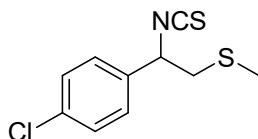

**(2-(4-chlorophenyl)-2-isothiocyanatoethyl)(methyl)sulfane (3m)**

Yellow oil (87.5 mg, 72% yield).  $^1\text{H}$  NMR (400 MHz,  $\text{CDCl}_3$ , ppm):  $\delta = 7.37$  (d,  $J = 8.4$  Hz, 2 H), 7.28 (d,  $J = 8.4$  Hz, 2 H), 4.88–4.92 (t, 1 H), 2.89–3.01 (m, 2 H), 2.10 (s, 3 H);  $^{13}\text{C}$  NMR (100 MHz,  $\text{CDCl}_3$ , ppm):  $\delta = 136.3, 135.2, 134.5, 129.1, 127.5, 61.1, 43.1, 16.5$ ; HRMS calcd for  $\text{C}_{10}\text{H}_{10}\text{ClNS}_2$   $[\text{M}+\text{H}]^+$  244.0016; found: 244.0024.

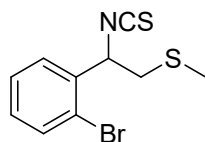

**(2-(2-bromophenyl)-2-isothiocyanatoethyl)(methyl)sulfane (3n)**

Colourless oil (106.2 mg, 74% yield). <sup>1</sup>H NMR (400 MHz, CDCl<sub>3</sub>, ppm) : δ= 7.55 (d, *J*= 7.2 Hz, 2 H), 7.38-7.41 (m, 1 H), 7.19-7.24 (m, 1 H), 5.44-5.46 (t, 1 H), 2.82-3.08 (m, 1 H), 2.20 (s, 3 H); <sup>13</sup>C NMR (100 MHz, CDCl<sub>3</sub>, ppm): δ= 136.7, 135.3, 133.1, 130.0, 128.1, 127.7, 121.5, 60.9, 41.7, 16.2; HRMS calcd for C<sub>10</sub>H<sub>10</sub>BrNS<sub>2</sub> [M+H]<sup>+</sup> 287.9511; found: 287.9519.

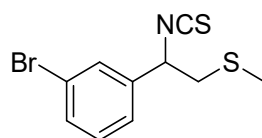

**(2-(3-bromophenyl)-2-isothiocyanatoethyl)(methyl)sulfane (3o)**

Colourless oil (97.5 mg, 68% yield). <sup>1</sup>H NMR (400 MHz, CDCl<sub>3</sub>, ppm) : δ= 7.47-7.49 (m, 2 H), 7.27-7.28 (m, 2 H), 4.88-4.92 (t, 1 H), 2.90-3.00 (m, 2 H), 2.12 (s, 3 H); <sup>13</sup>C NMR (100 MHz, CDCl<sub>3</sub>, ppm): δ= 139.8, 135.4, 131.7, 130.4, 129.2, 124.7, 122.8, 61.1, 43.1, 16.5; HRMS calcd for C<sub>10</sub>H<sub>10</sub>BrNS<sub>2</sub> [M+H]<sup>+</sup> 287.9511; found: 287.9505.

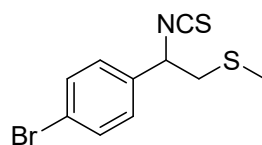

**(2-(4-bromophenyl)-2-isothiocyanatoethyl)(methyl)sulfane (3p)**

Colourless oil (106.5 mg, 73% yield). <sup>1</sup>H NMR (400 MHz, CDCl<sub>3</sub>, ppm) : δ= 7.53 (d, *J*= 6.4 Hz, 2 H), 7.22 (d, *J*= 6.8 Hz, 2 H), 4.89-4.90 (t, 1 H), 2.90-3.01 (m, 2 H), 2.10 (s, 3 H); <sup>13</sup>C NMR (100 MHz, CDCl<sub>3</sub>, ppm): δ= 136.8, 135.4, 132.2, 132.0, 128.0, 127.7, 122.7, 61.4, 43.1, 16.5; HRMS calcd for C<sub>10</sub>H<sub>10</sub>BrNS<sub>2</sub> [M+H]<sup>+</sup> 287.9511; found: 287.9512.

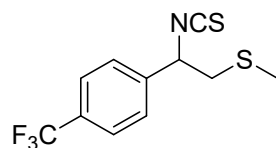

**(2-isothiocyanato-2-(4-(trifluoromethyl)phenyl)ethyl)(methyl)sulfane (3q)**

Yellow oil (62.3 mg, 45% yield).  $^1\text{H}$  NMR (400 MHz,  $\text{CDCl}_3$ , ppm) :  $\delta$ = 7.67 (d,  $J$ = 8.4 Hz, 2 H), 7.48 (d,  $J$ = 8 Hz, 2 H), 4.98-5.02 (t, 1 H), 2.93-3.04 (m, 2 H), 2.12 (s, 3 H);  $^{13}\text{C}$  NMR (100 MHz,  $\text{CDCl}_3$ , ppm):  $\delta$ = 141.66, 135.94, 130.9 (d,  $J$ = 32.5 Hz), 127.5 (d,  $J$ = 168.2 Hz), 125.9 (d,  $J$ = 32.5 Hz), 123.7(d,  $J$ = 270.9 Hz), 61.3, 43.1, 16.5.  $^{19}\text{F}$  NMR (377 MHz,  $\text{CDCl}_3$ , ppm) :  $\delta$ = -62.6; HRMS calcd for  $\text{C}_{10}\text{H}_{11}\text{NS}_2$   $[\text{M}+\text{H}]^+$  278.0280; found: 278.0282.

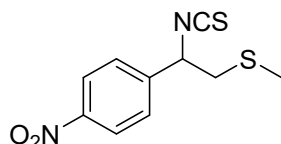

**(2-isothiocyanato-2-(4-nitrophenyl)ethyl)(methyl)sulfane (3r)**

Yellow oil (64.8 mg, 51% yield).  $^1\text{H}$  NMR (400 MHz,  $\text{CDCl}_3$ , ppm) :  $\delta$ = 8.27 (d,  $J$ = 8.8 Hz, 2 H), 7.55 (d,  $J$ = 8.4 Hz, 2 H), 5.06-5.09 (t, 1 H), 2.98-3.06 (m, 2 H), 2.14 (s, 3 H);  $^{13}\text{C}$  NMR (100 MHz,  $\text{CDCl}_3$ , ppm):  $\delta$ = 147.9, 144.6, 136.9, 127.3, 127.2, 124.2, 60.9, 43.0, 16.6; HRMS calcd for  $\text{C}_{10}\text{H}_{10}\text{N}_2\text{O}_2\text{S}_2$   $[\text{M}+\text{H}]^+$  255.0256; found: 255.0248.

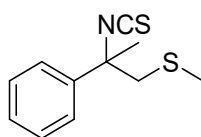

**(2-isothiocyanato-2-phenylpropyl)(methyl)sulfane (3s)**

Colourless oil (43.5 mg, 39% yield).  $^1\text{H}$  NMR (400 MHz,  $\text{CDCl}_3$ , ppm) :  $\delta$ = 7.30-7.35 (m, 4 H), 7.23-7.27 (m, 1 H), 2.97 (s, 2 H), 1.94 (s, 3 H), 1.80 (s, 3 H);  $^{13}\text{C}$  NMR (100 MHz,  $\text{CDCl}_3$ , ppm):  $\delta$ = 141.8, 134.2, 128.7, 128.0, 125.0, 67.9, 49.7, 28.6, 17.7; HRMS calcd for  $\text{C}_{11}\text{H}_{13}\text{NS}_2$   $[\text{M}+\text{H}]^+$  224.0562; found: 244.0557.

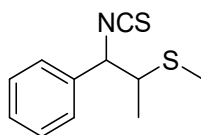

**(1-isothiocyanato-1-phenylpropan-2-yl)(methyl)sulfane ((rac)-3t)**

Yellow oil (66.8 mg, 60% yield).  $^1\text{H}$  NMR (400 MHz,  $\text{CDCl}_3$ , ppm) :  $\delta$ = 7.31-7.39 (m, 5 H), 4.98 (d,  $J$ = 4.8 Hz, 1 H), 2.99-3.04 (t, 1 H), 2.05 (s, 3 H), 1.27 (d,  $J$ = 7.2 Hz, 3 H);  $^{13}\text{C}$  NMR (100 MHz,  $\text{CDCl}_3$ , ppm):  $\delta$ = 136.9, 133.7, 128.7, 128.4, 126.5, 65.9, 48.8, 15.8, 14.6; HRMS calcd for  $\text{C}_{11}\text{H}_{13}\text{NS}_2$   $[\text{M}+\text{H}]^+$  224.0562; found: 224.0561.

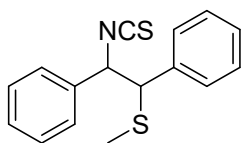

**(2-isothiocyanato-1,2-diphenylethyl)(methyl)sulfane ((rac)-3u)**

Yellow oil (106.8 mg, 75% yield).  $^1\text{H}$  NMR (400 MHz,  $\text{CDCl}_3$ , ppm) :  $\delta$ = 7.24-7.27 (m, 6 H), 7.16-7.19 (m, 2 H), 7.11-7.13 (m, 2 H), 5.04 (d,  $J$ = 7.2 Hz, 1 H), 3.98 (d,  $J$ = 7.2 Hz, 1 H), 1.74 (s, 3 H);  $^{13}\text{C}$  NMR (100 MHz,  $\text{CDCl}_3$ , ppm):  $\delta$ = 137.0, 136.7, 134.2, 128.8, 128.7, 128.5, 128.2, 126.9, 66.0, 58.9, 15.3; HRMS calcd for  $\text{C}_{16}\text{H}_{15}\text{NS}_2$   $[\text{M}+\text{H}]^+$  286.0719; found: 286.0714.

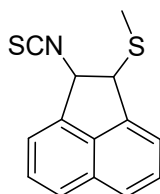

**(2-isothiocyanato-1,2-dihydroacenaphthylen-1-yl)(methyl)sulfane ((rac)-3v)**

Yellow oil (73.2 mg, 57% yield).  $^1\text{H}$  NMR (400 MHz,  $\text{CDCl}_3$ , ppm) :  $\delta$ = 7.65-7.72 (m, 2 H), 7.45-7.52 (m, 3 H), 7.38 (d,  $J$ = 6.8 Hz, 1 H), 5.54 (d,  $J$ = 0.8 Hz, 1 H), 4.68 (d,  $J$ = 1.2 Hz, 1 H), 2.02 (s, 3 H);  $^{13}\text{C}$  NMR (100 MHz,  $\text{CDCl}_3$ , ppm):  $\delta$ = 139.3, 138.7, 136.1, 135.3, 131.1, 128.6, 128.3, 125.6, 124.6, 120.9, 120.3, 67.6, 56.8; HRMS calcd for  $\text{C}_{14}\text{H}_{11}\text{NS}_2$   $[\text{M}+\text{H}]^+$  258.0406; found: 258.0407.

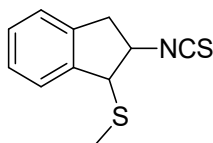

**(2-isothiocyanato-2,3-dihydro-1H-inden-1-yl)(methyl)sulfane ((rac)-3w)**

Orange oil (48.7 mg, 44% yield).  $^1\text{H}$  NMR (400 MHz,  $\text{CDCl}_3$ , ppm) :  $\delta$ = 7.15-7.30 (m, 4 H), 5.04 (d,  $J$ = 7.2 Hz, 1 H), 3.44-3.48 (m, 1 H), 3.28-3.34 (m, 1 H), 2.77-2.83 (m, 1 H), 2.22 (s, 3 H);  $^{13}\text{C}$  NMR (100 MHz,  $\text{CDCl}_3$ , ppm):  $\delta$ = 140.0, 139.2, 134.5, 129.2, 127.6, 124.7, 123.8, 67.4, 53.1, 37.2, 14.8; HRMS calcd for  $\text{C}_{11}\text{H}_{11}\text{NS}_2$   $[\text{M}+\text{H}]^+$  222.0406; found: 222.0404.

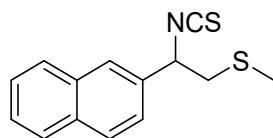

**(2-isothiocyanato-2-(naphthalen-2-yl)ethyl)(methyl)sulfane (3x)**

Grey oil (44.0 mg, 34% yield).  $^1\text{H}$  NMR (400 MHz,  $\text{CDCl}_3$ , ppm) :  $\delta$ = 7.73-7.82 (m, 4 H), 7.44-7.46 (m, 2 H), 7.34-7.36 (m, 1 H), 4.99-5.03 (t, 1 H), 2.96-3.00 (m, 2 H), 2.04 (s, 3 H);  $^{13}\text{C}$  NMR (100 MHz,  $\text{CDCl}_3$ , ppm):  $\delta$ = 135.1, 133.2, 133.1, 129.0, 128.1, 127.8, 126.7, 126.6, 125.5, 123.4, 62.1, 43.1, 16.5; HRMS calcd for  $\text{C}_{14}\text{H}_{13}\text{NS}_2$   $[\text{M}+\text{H}]^+$  260.0562; found: 260.0565.

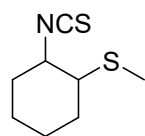

**(2-isothiocyanatocyclohexyl)(methyl)sulfane ((rac)-3aa)**

Colourless oil (33.7 mg, 36% yield).  $^1\text{H}$  NMR (400 MHz,  $\text{CDCl}_3$ , ppm) :  $\delta$ = 3.55-3.60 (m, 1 H), 2.61-2.65 (m, 1 H), 2.19 (s, 4 H), 2.10-2.12 (m, 1 H), 1.72-1.74 (m, 2 H), 1.59-1.64 (m, 1 H), 1.42-1.45 (m, 1 H), 1.31-1.36 (m, 2 H);  $^{13}\text{C}$  NMR (100 MHz,  $\text{CDCl}_3$ , ppm):  $\delta$ = 131.8, 80.5, 50.2, 33.0, 31.0, 24.5, 23.4, 14.4; HRMS calcd for  $\text{C}_8\text{H}_{13}\text{NS}_2$   $[\text{M}+\text{H}]^+$  188.0568; found: 188.0566.

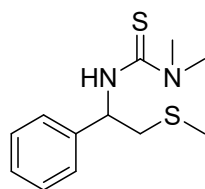

**1,1-dimethyl-3-(2-(methylthio)-1-phenylethyl)thiourea (5)**

Yellow oil (213.4 mg, 84% yield).  $^1\text{H}$  NMR (400 MHz,  $\text{CDCl}_3$ , ppm) :  $\delta$ = 7.26 (d,  $J$ = 4.4 Hz, 4 H), 7.17-7.20 (m, 1 H), 6.03 (d,  $J$ = 6.8 Hz, 1 H), 5.74-5.78 (m, 1 H), 3.22 (s, 6 H), 2.92-3.05 (m, 2 H), 1.92 (s, 3 H);  $^{13}\text{C}$  NMR (100 MHz,  $\text{CDCl}_3$ , ppm):  $\delta$ =  $^{13}\text{C}$  NMR (101 MHz, )  $\delta$  181.2, 140.9, 128.5, 127.4, 126.4, 57.3, 40.4, 40.3, 15.9; HRMS calcd for  $\text{C}_{12}\text{H}_{18}\text{N}_2\text{S}_2$   $[\text{M}+\text{H}]^+$  255.0984; found: 255.0979.

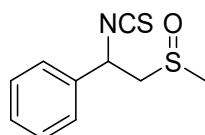

**(1-isothiocyanato-2-(methylsulfinyl)ethyl)benzene (6)**

Yellow oil (168.8 mg, 75% yield).  $^1\text{H}$  NMR (400 MHz,  $\text{CDCl}_3$ , ppm) :  $\delta$ = 7.30-7.40 (m, 5 H), 5.30-5.34 (m, 1 H), 3.53-3.59 (m, 1 H), 3.20-3.25 (m, 1 H), 2.89 (s, 3 H);  $^{13}\text{C}$  NMR (100 MHz,  $\text{CDCl}_3$ , ppm):  $\delta$ =  $^{13}\text{C}$  NMR (101 MHz, )  $\delta$ = 138.1, 136.6, 129.6, 129.43, 126.1, 125.9, 61.4, 56.6, 42.3; HRMS calcd for  $\text{C}_{10}\text{H}_{11}\text{NOS}_2$   $[\text{M}+\text{H}]^+$  226.0355; found: 226.0355.

**Reference:**

- (1) K. Okuma, T. Koike, S. Yamamoto, K. Yonekura, H. Ohta, *Chem. Lett.*, 1989, **11**, 1953-1956.
- (2) W. Feng, X. Zhang, *Chem. Commun.* 2019, **55**, 1144.
- (3) S. Chen, J. Wang and L. Xie , *Org. Biomol. Chem.*, 2021,**19**, 4037-4042.

# NMR spectra

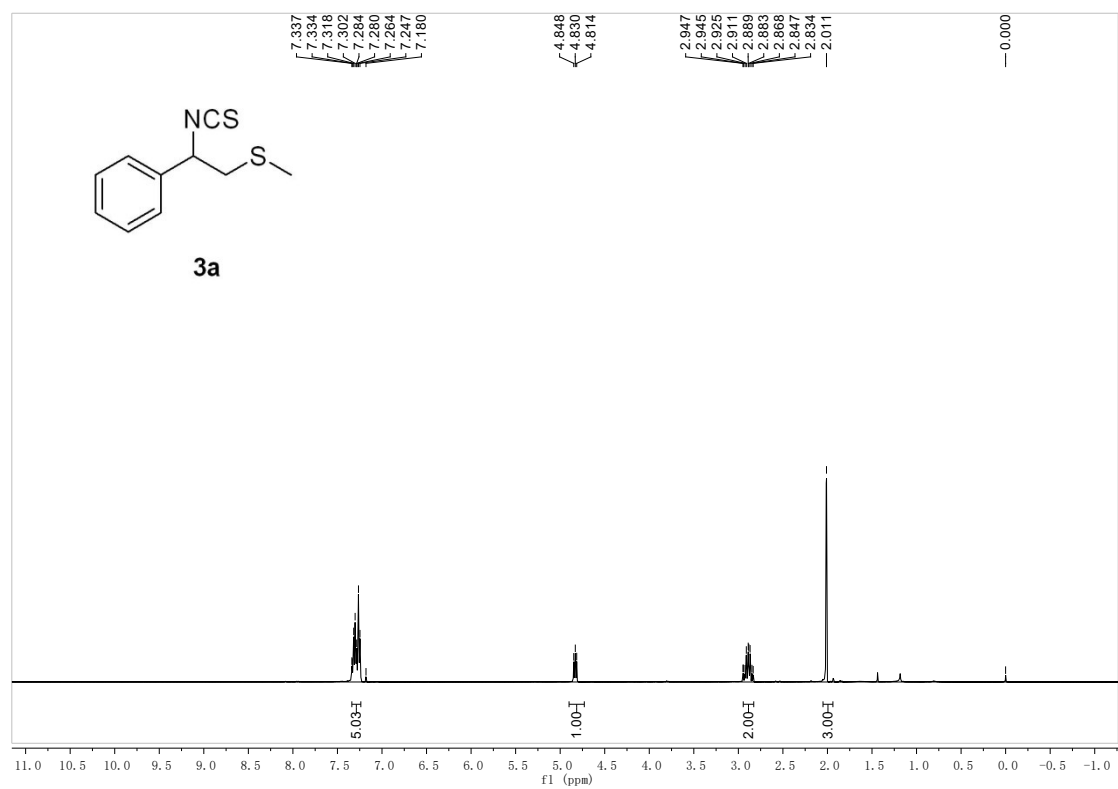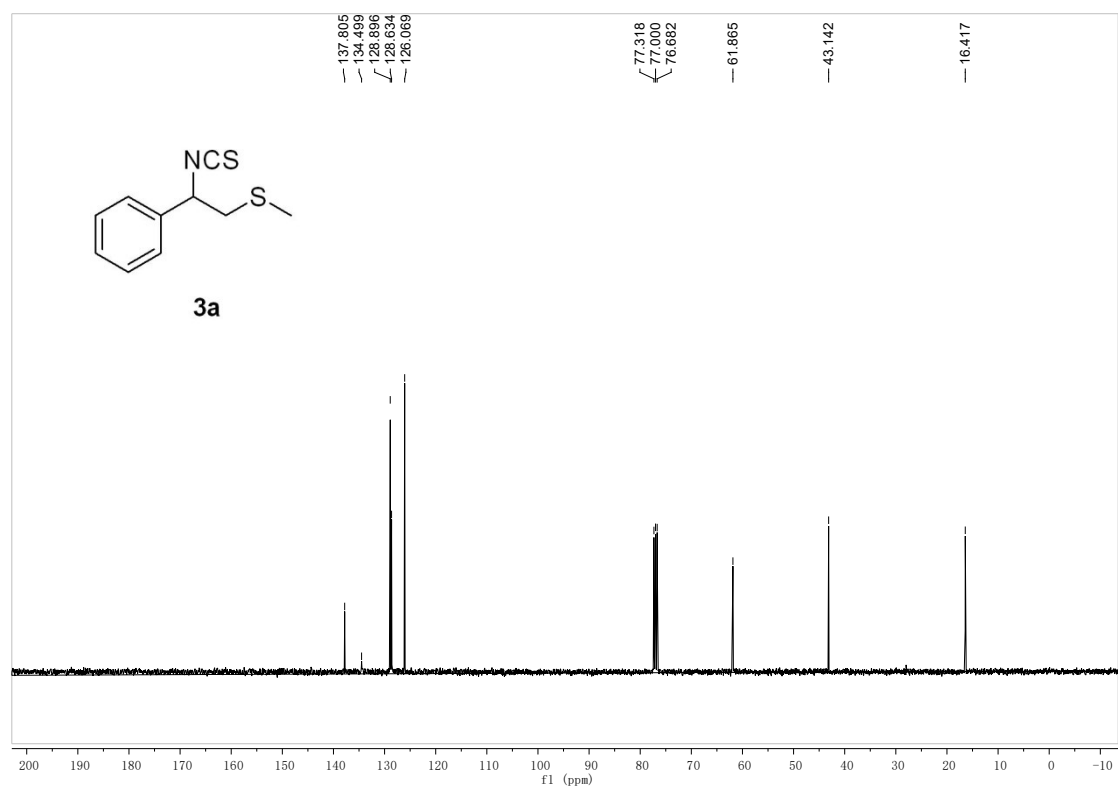



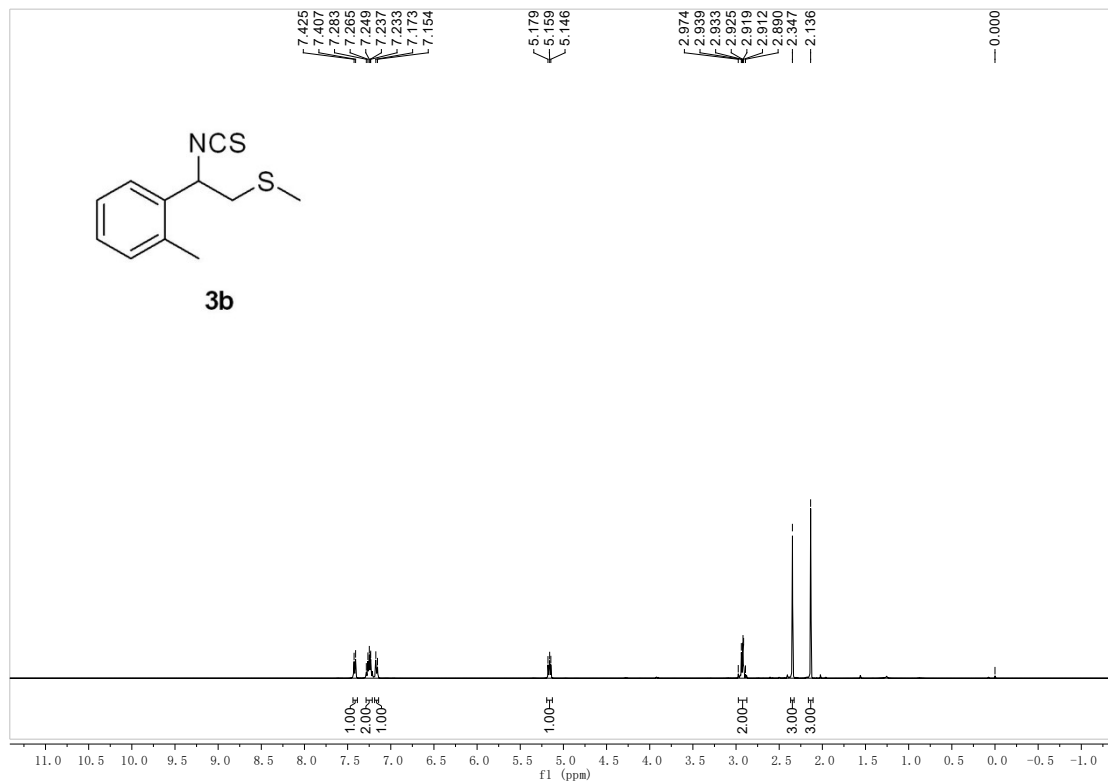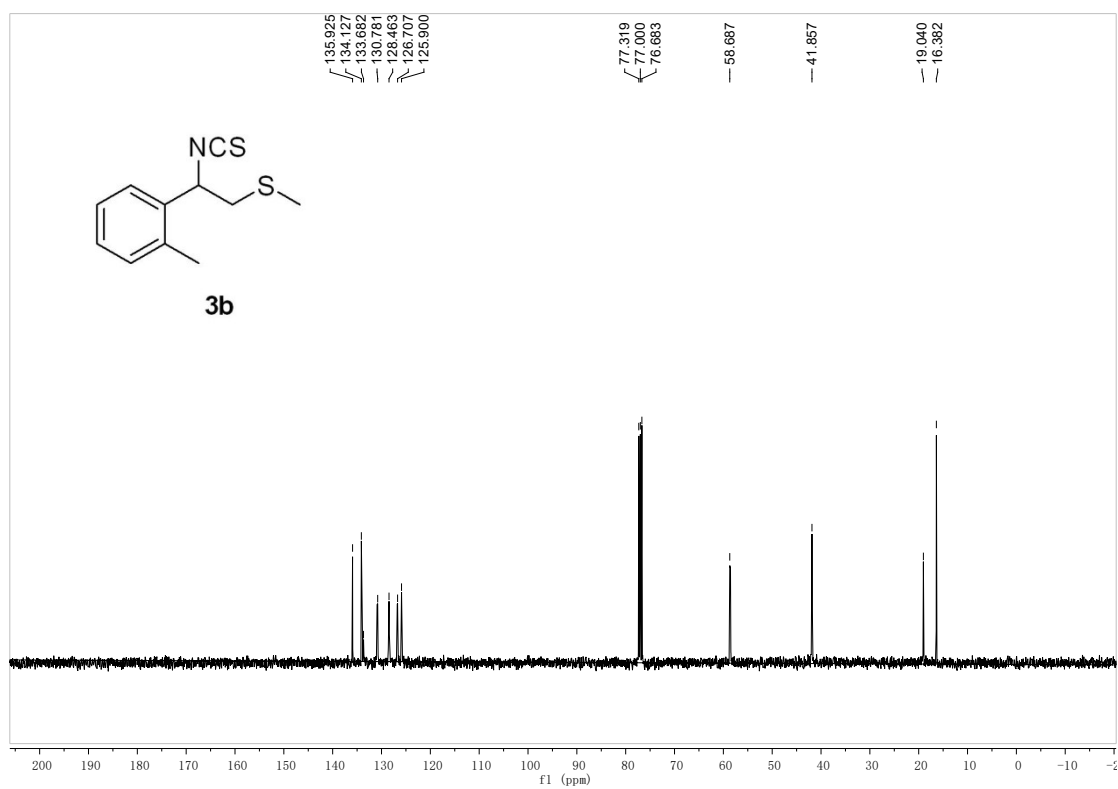

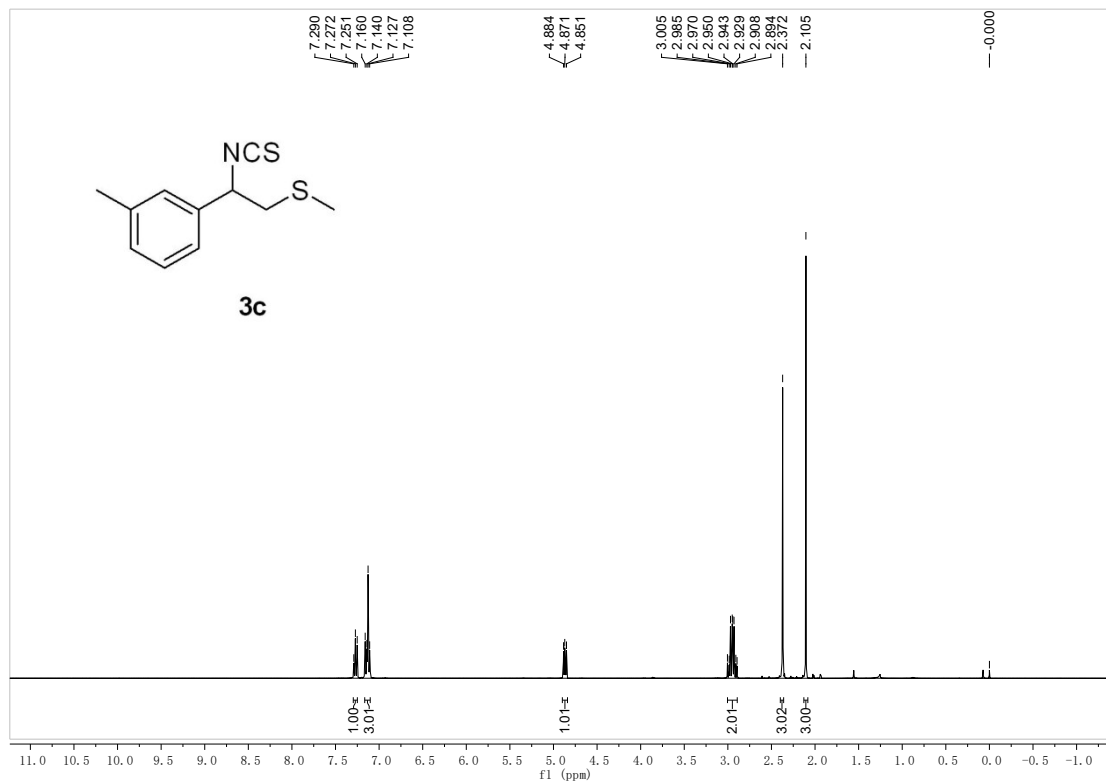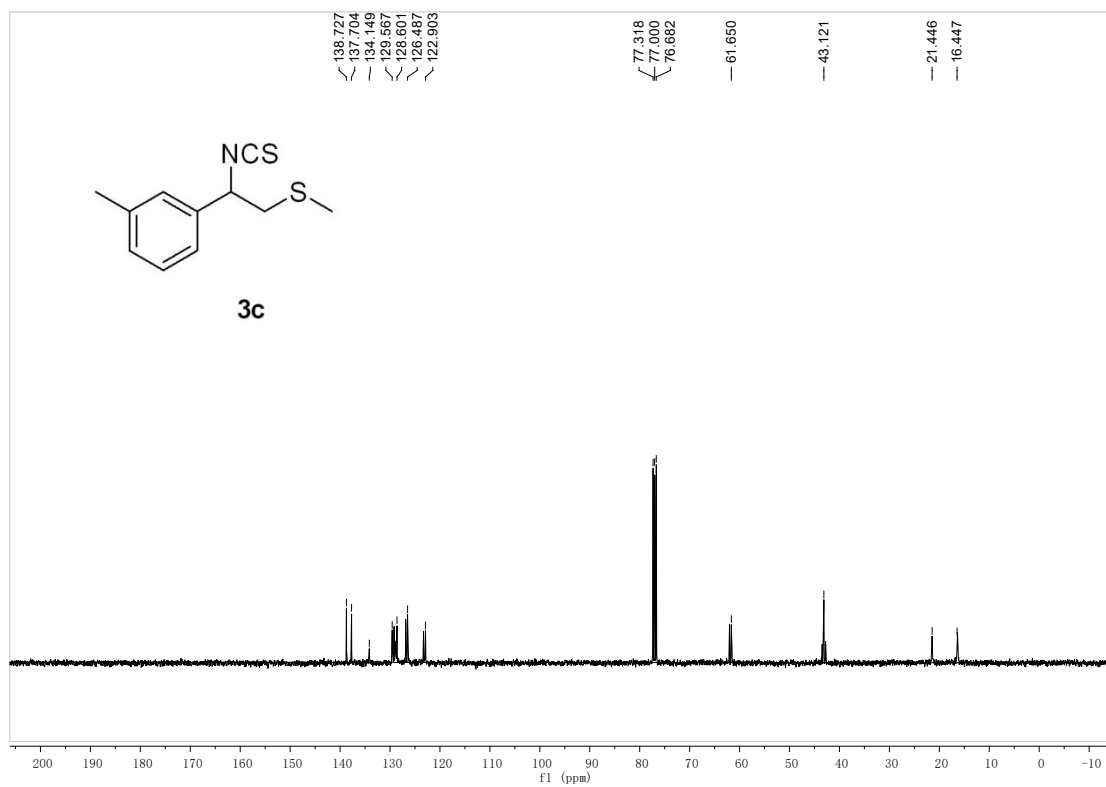

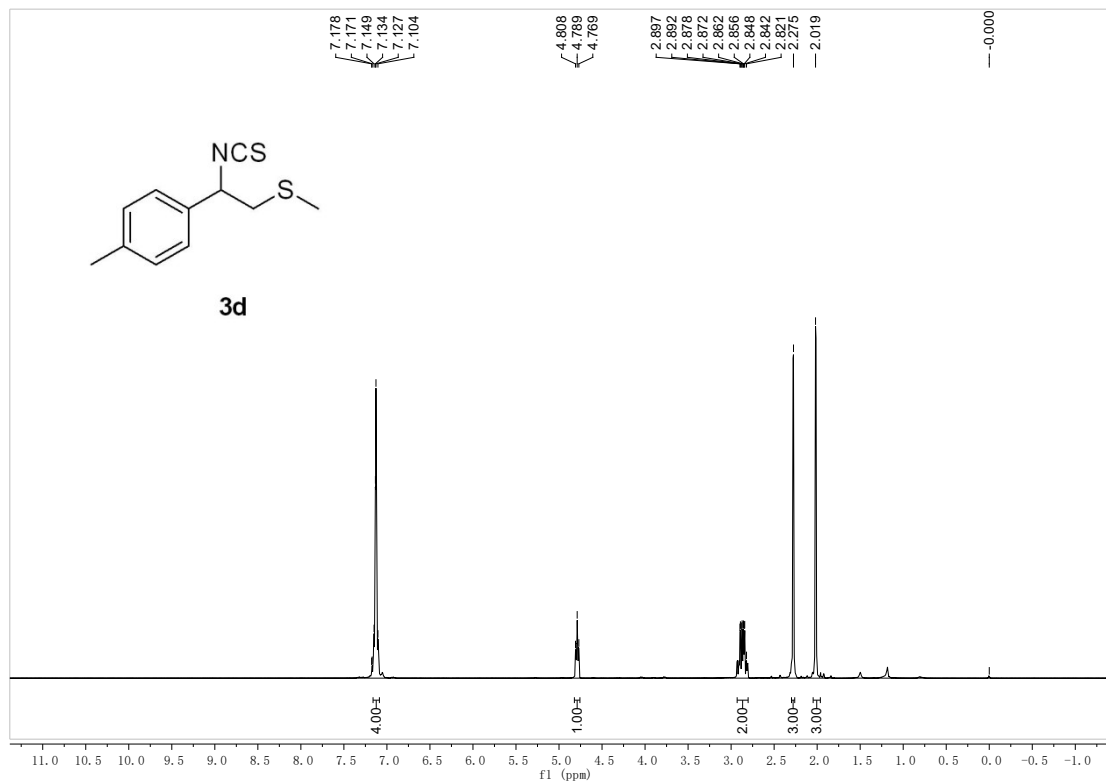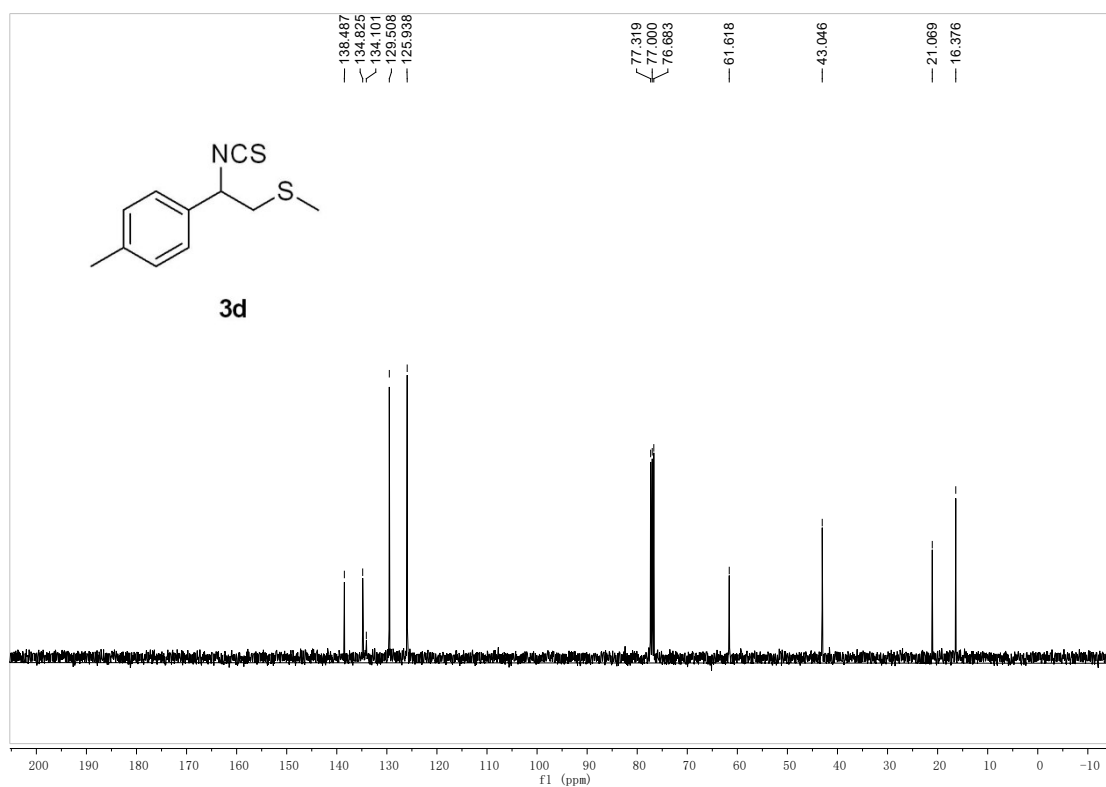

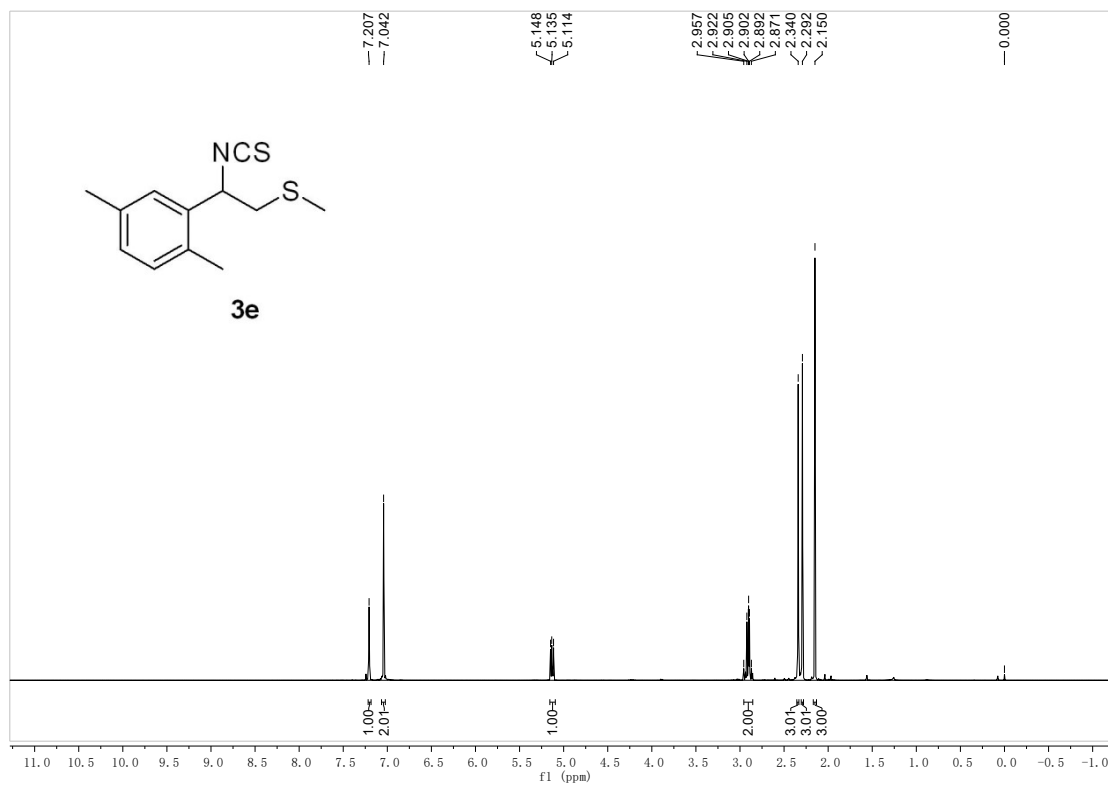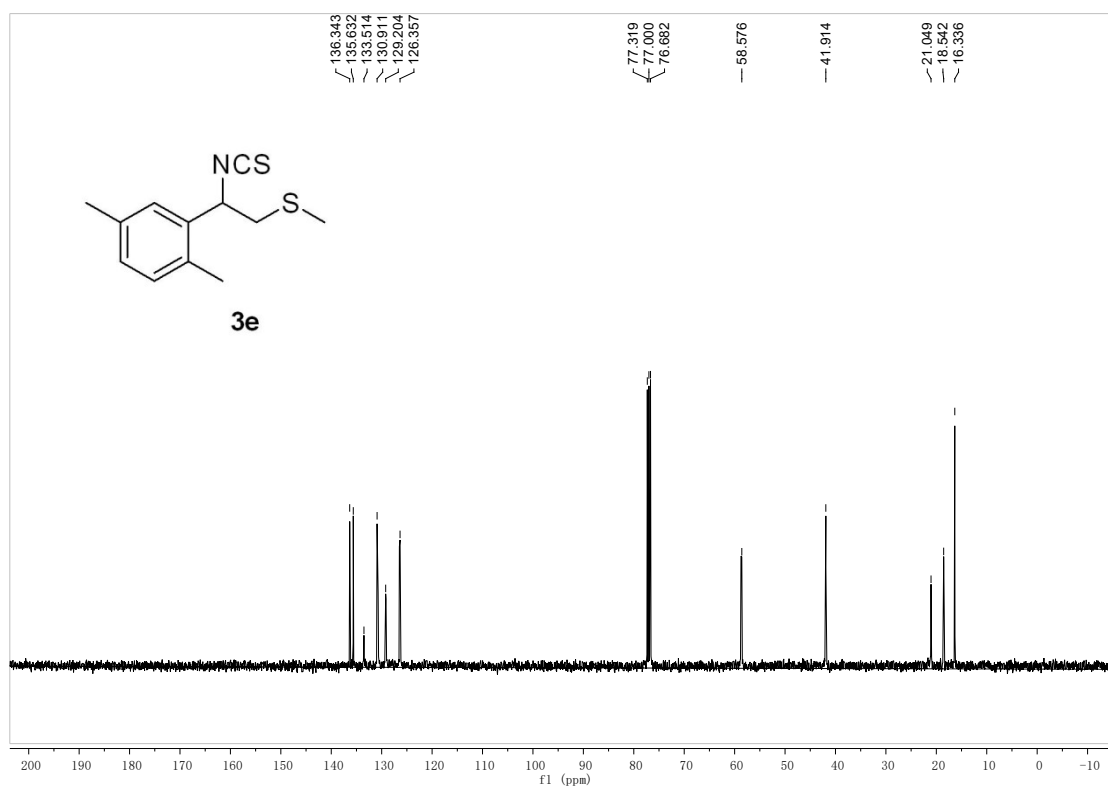

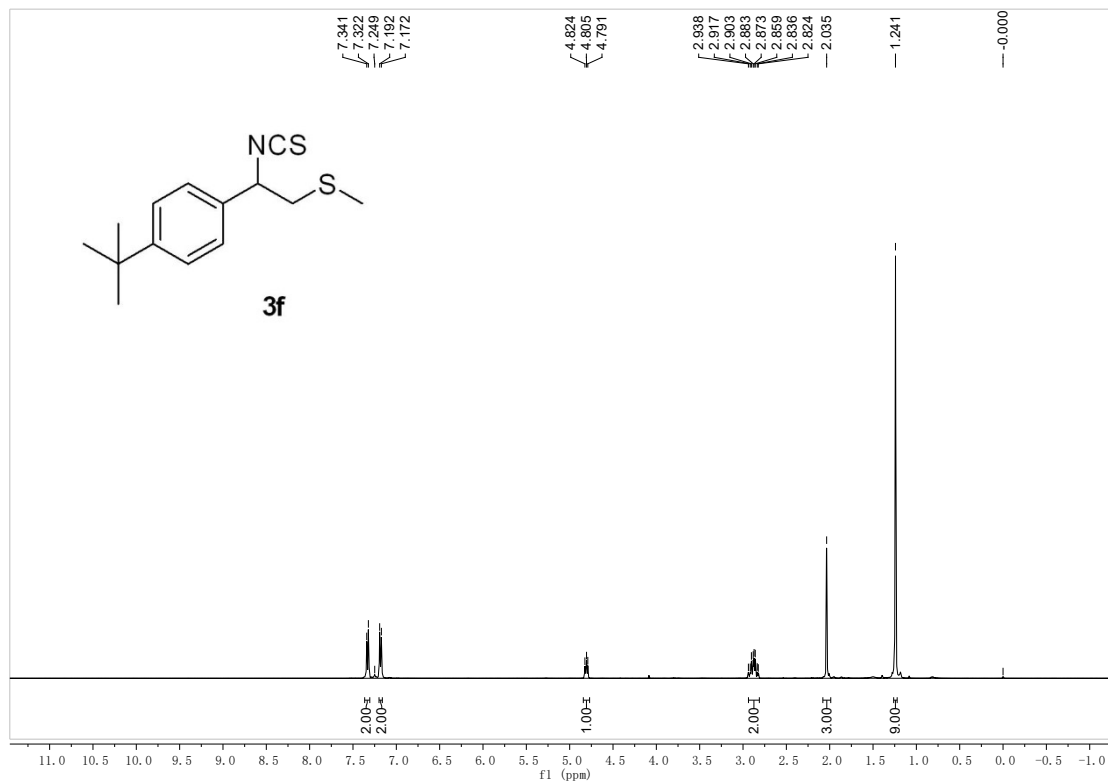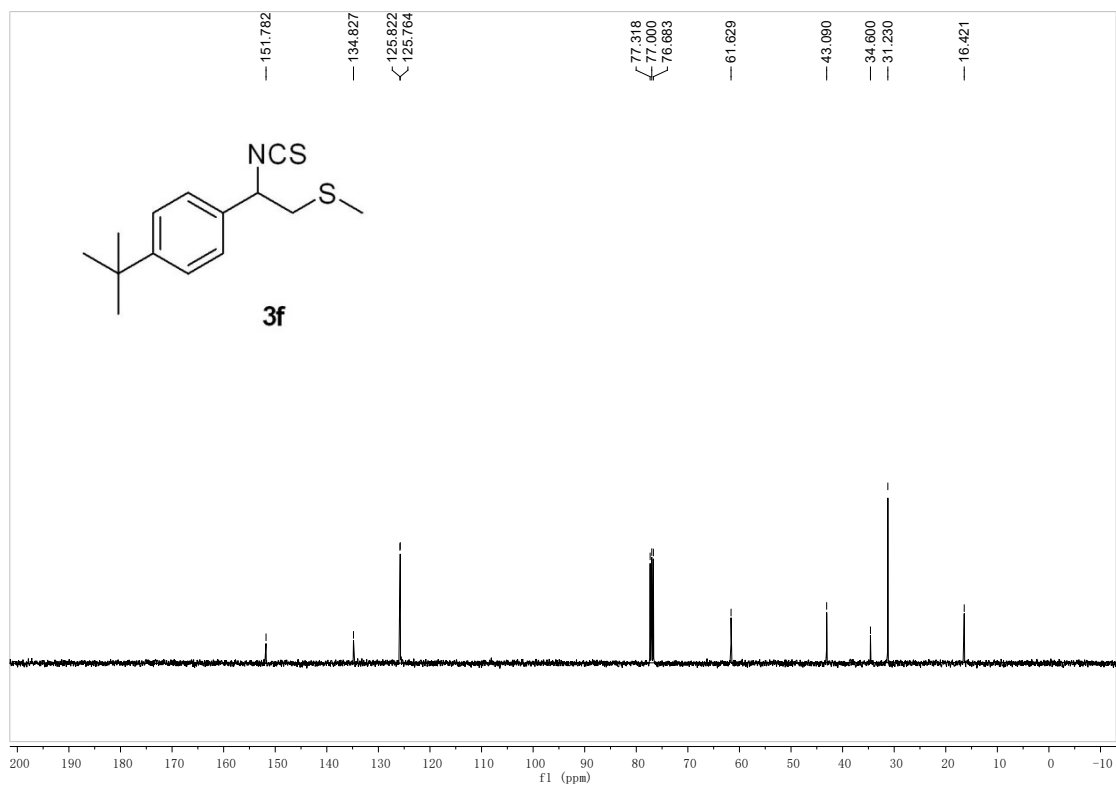

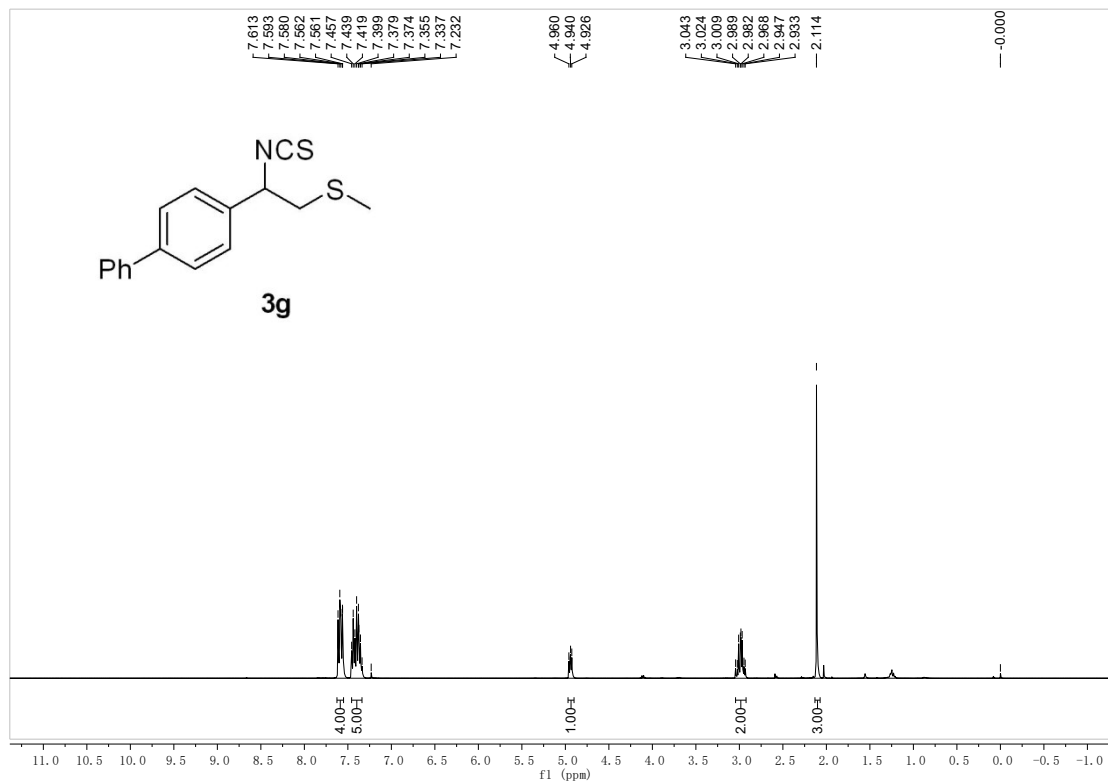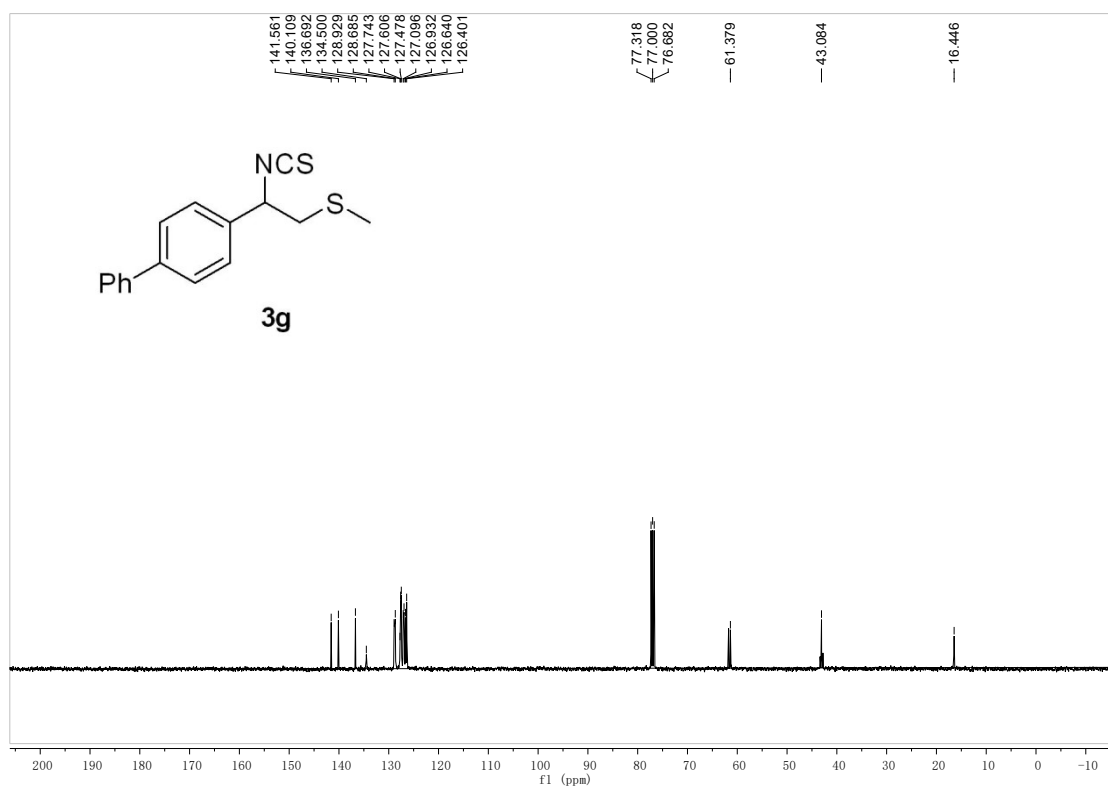

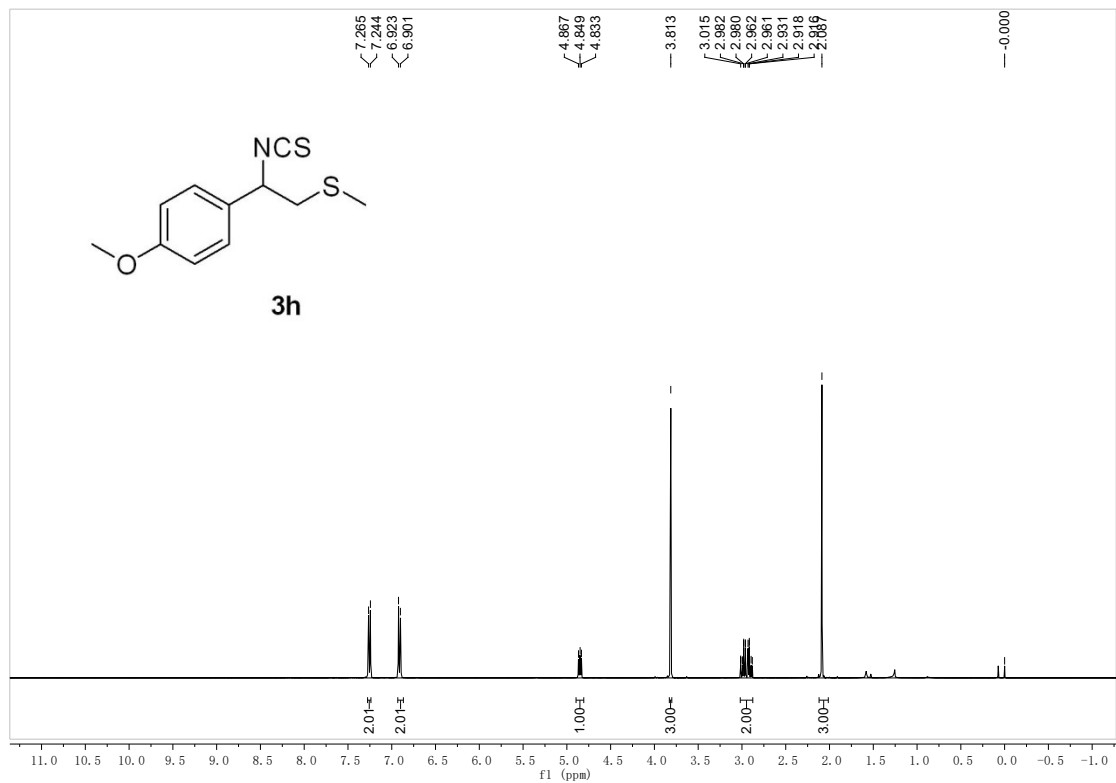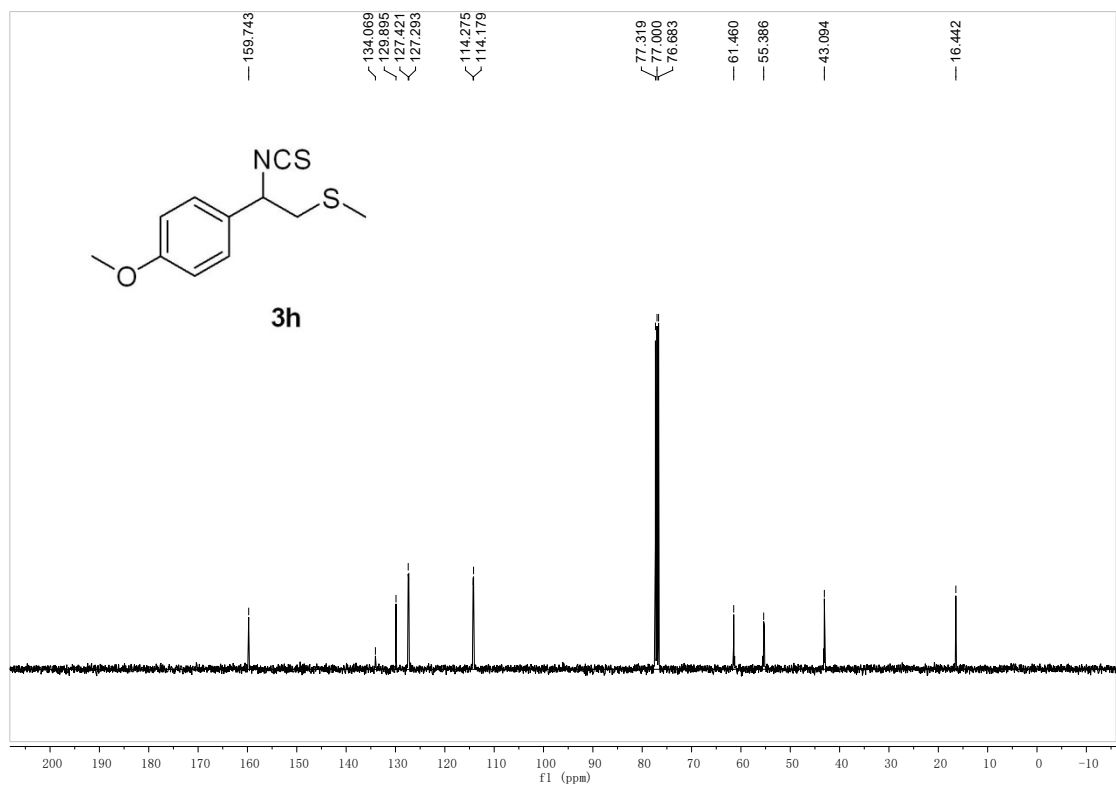

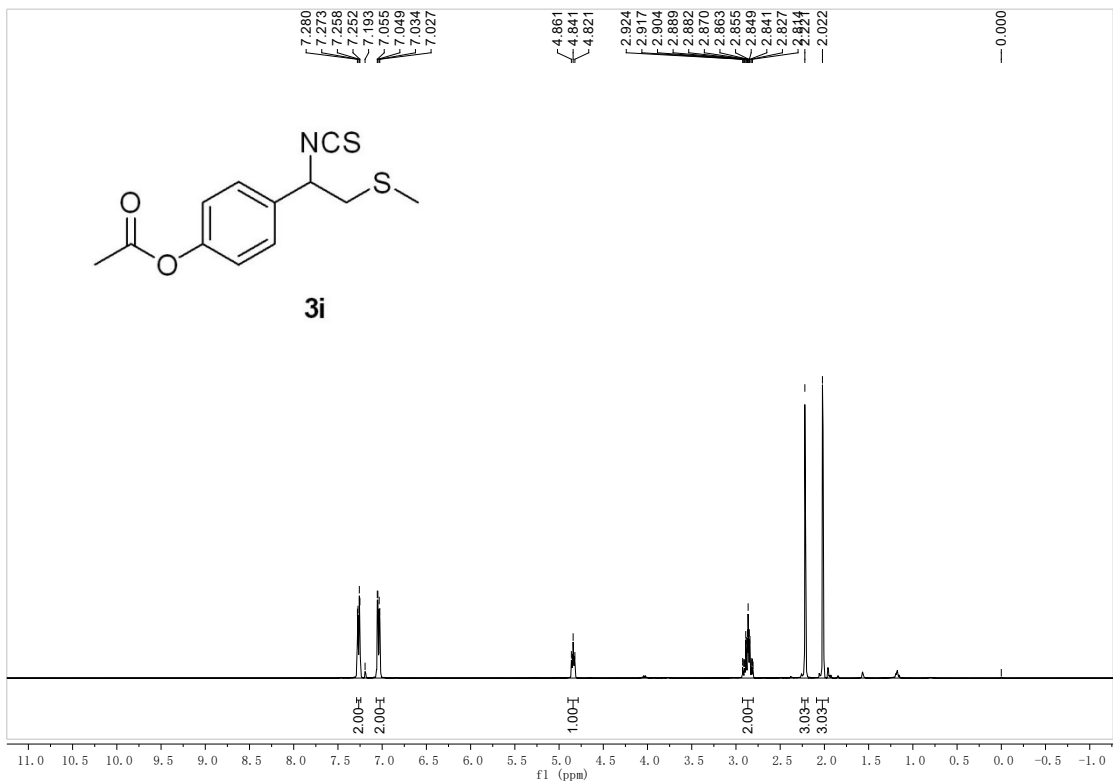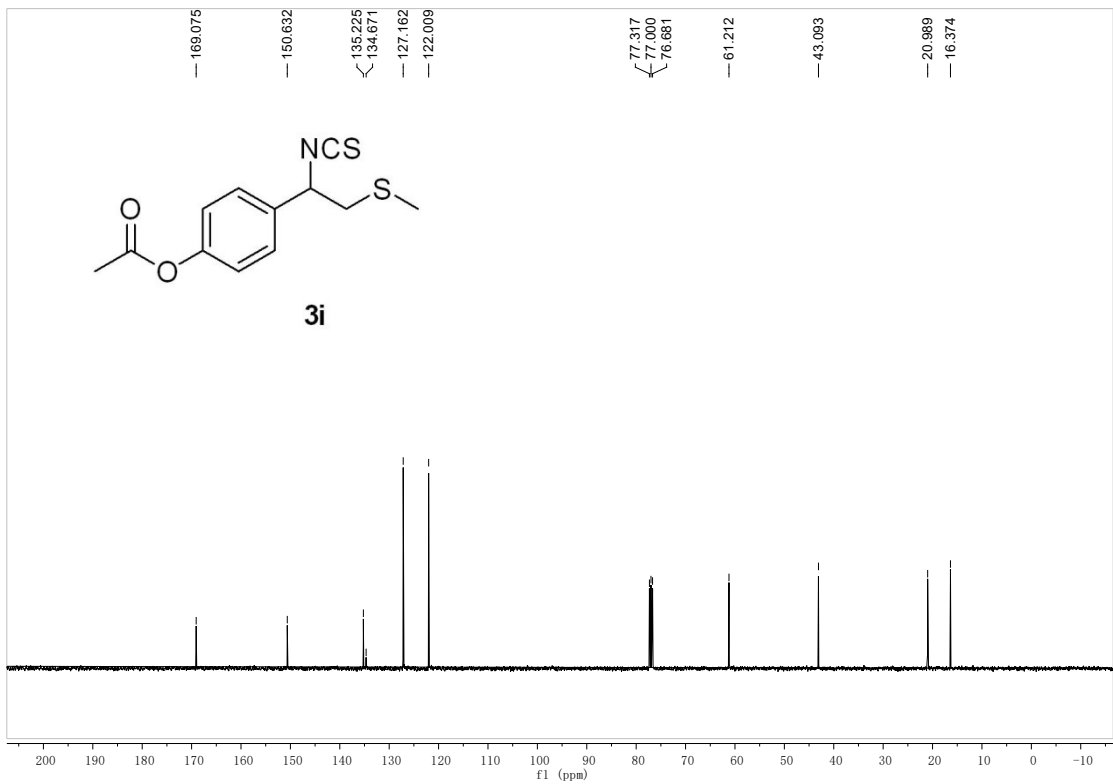



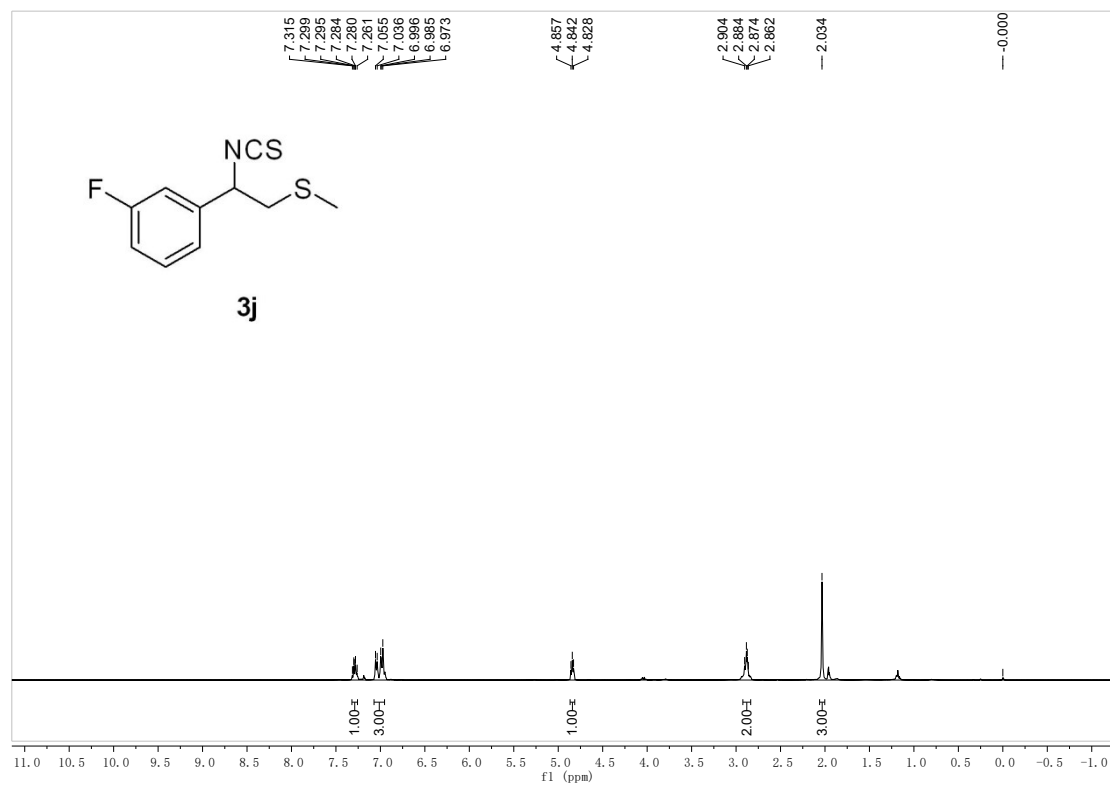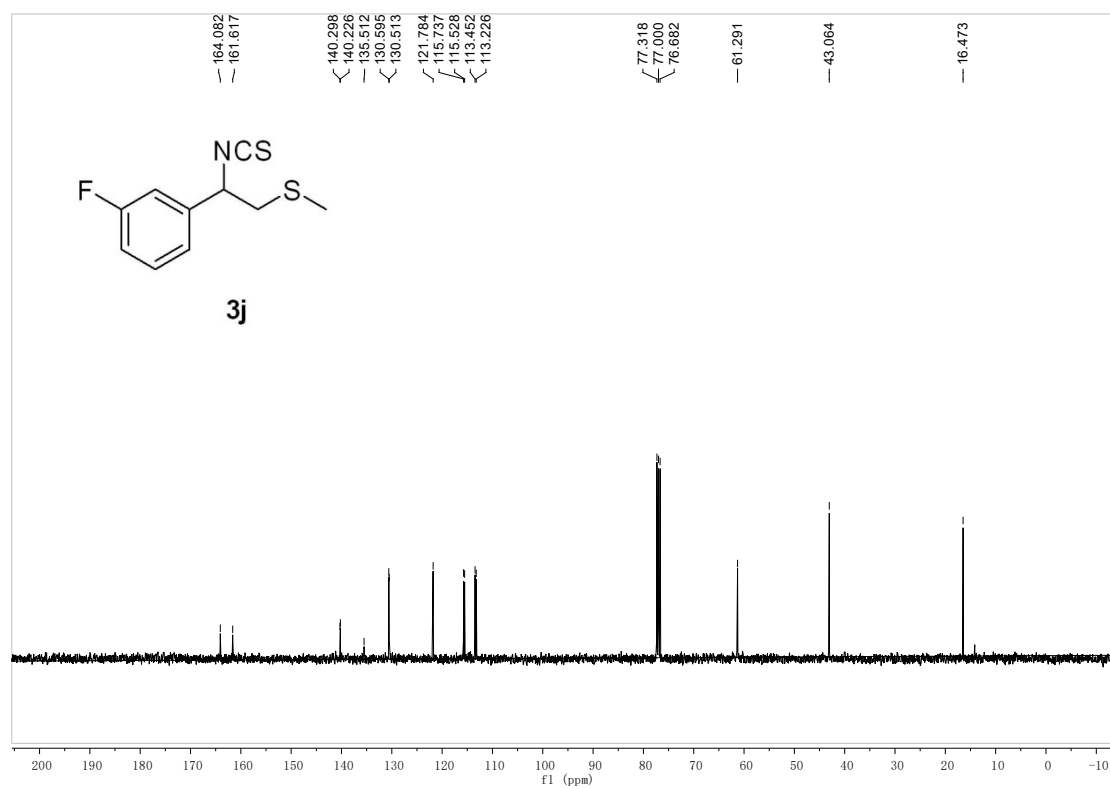

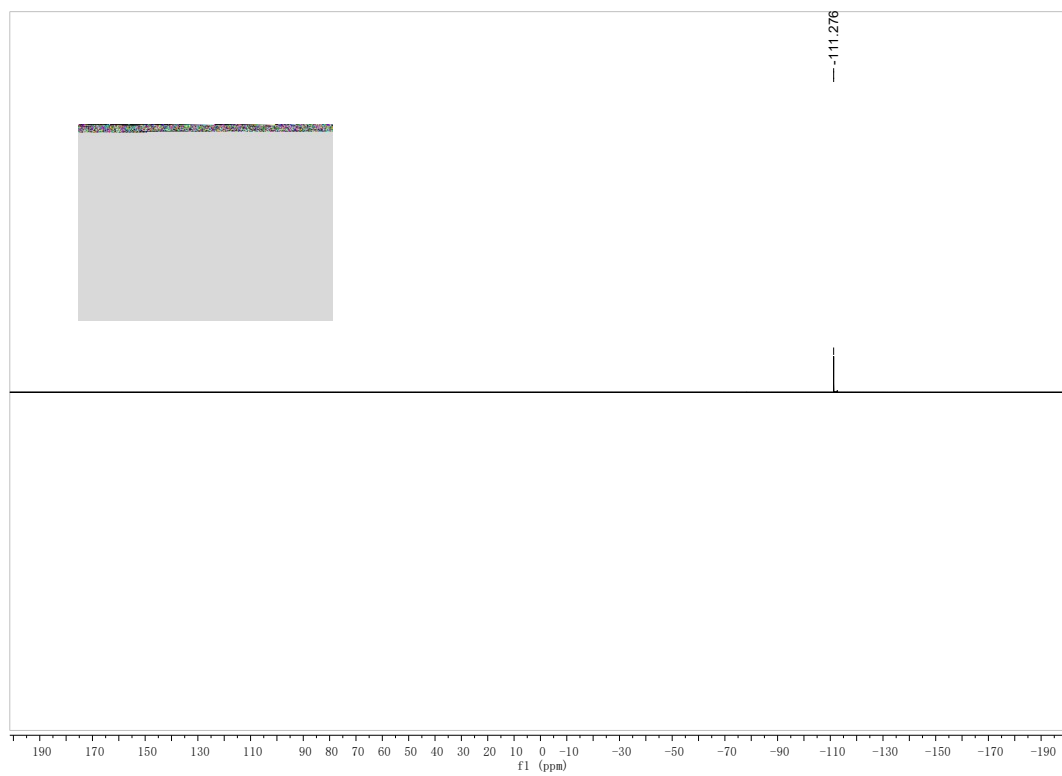

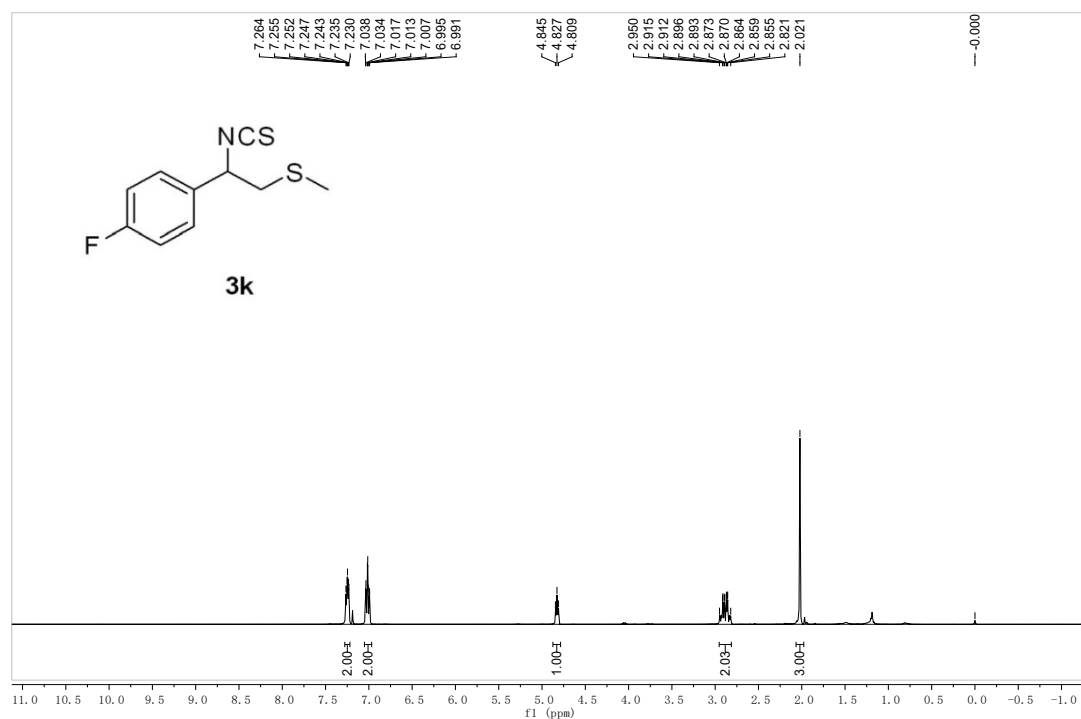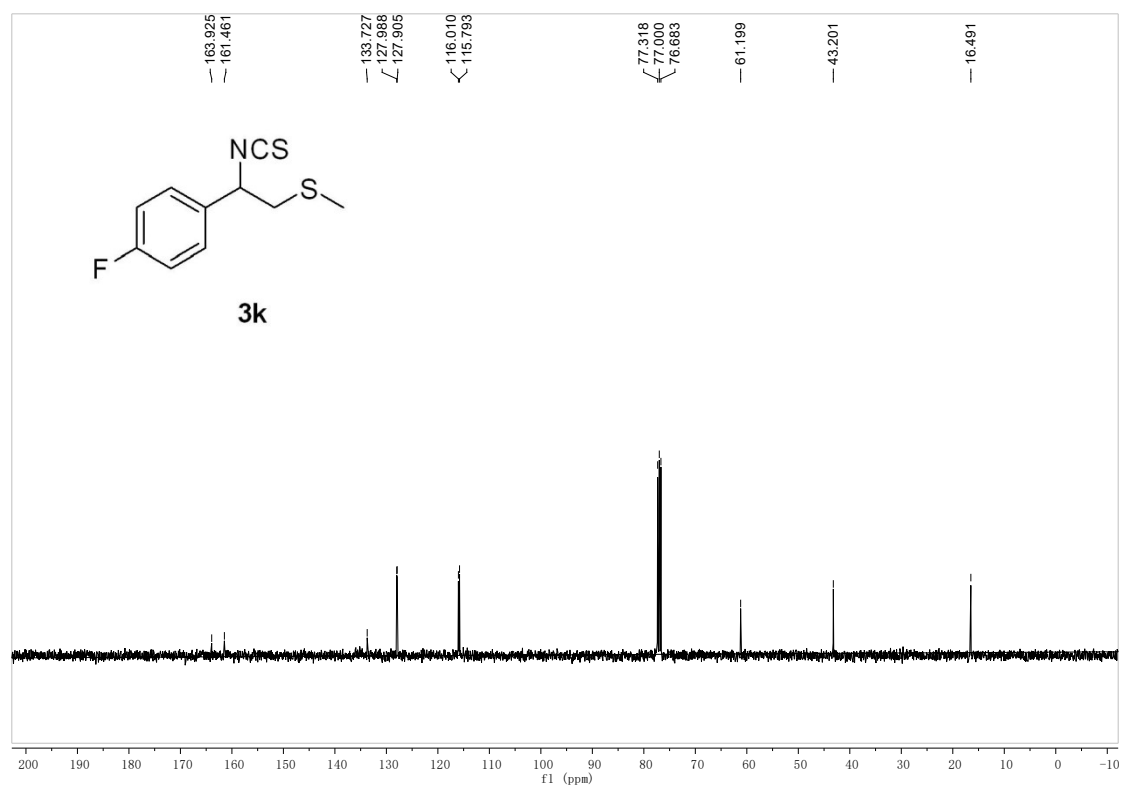

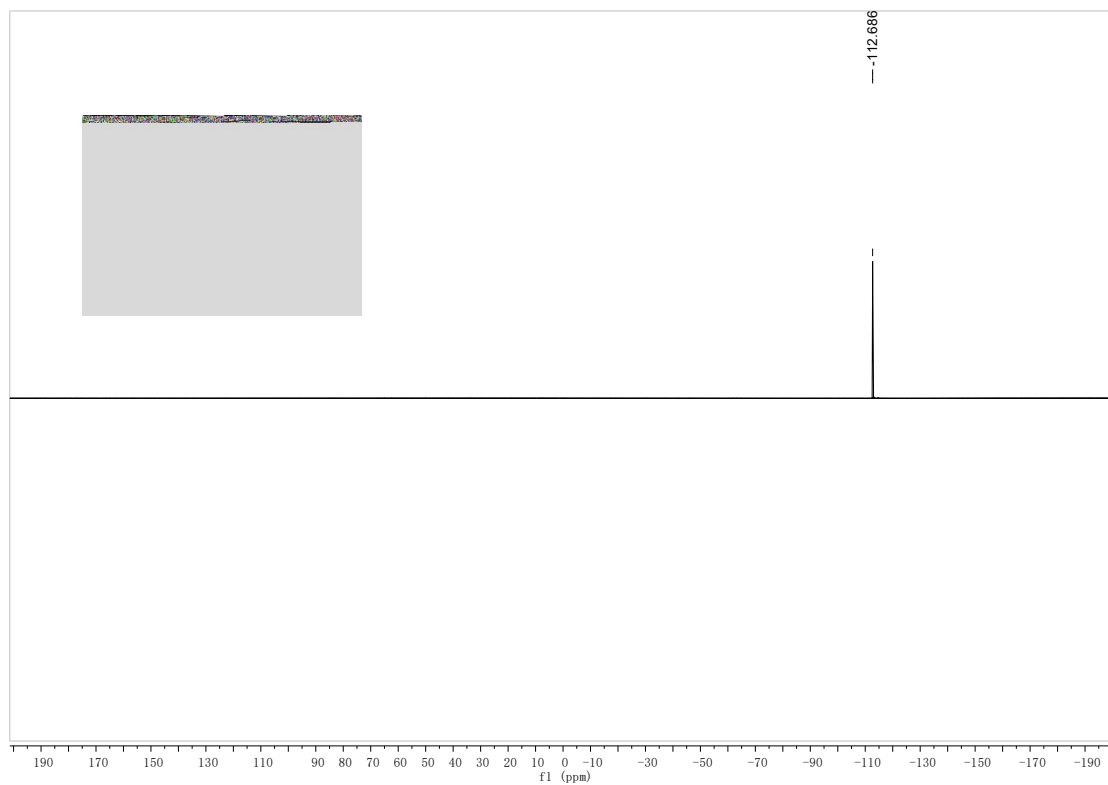

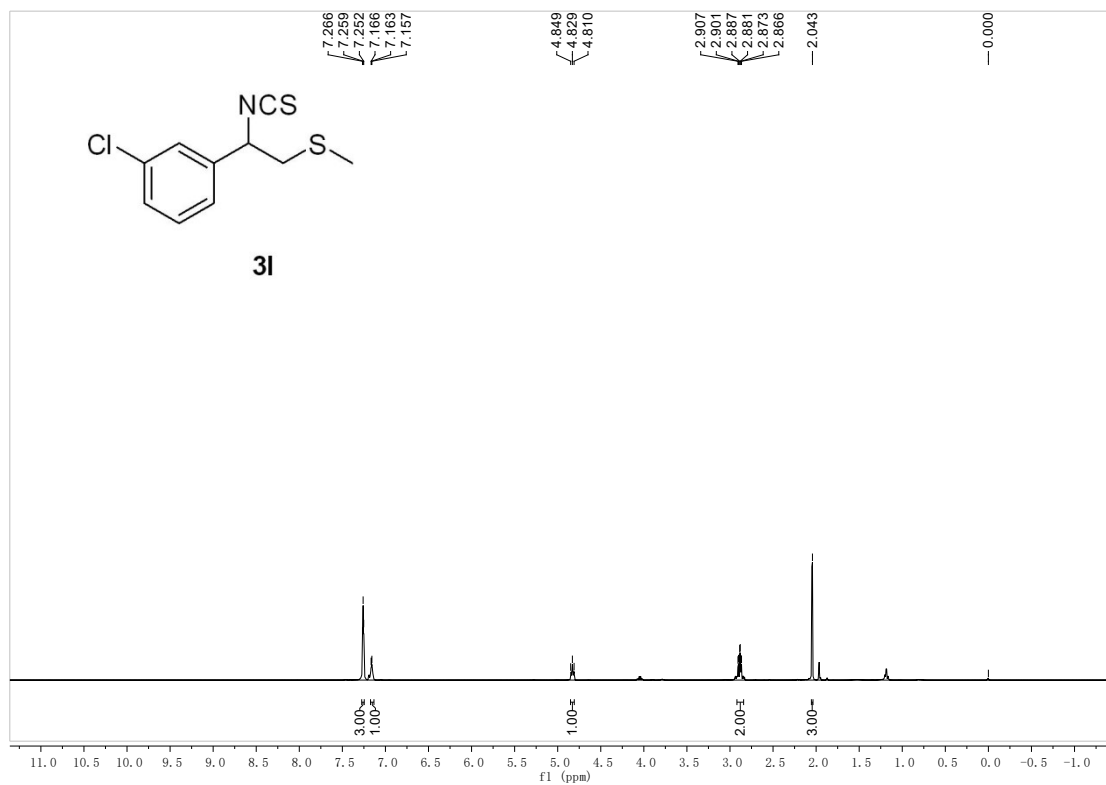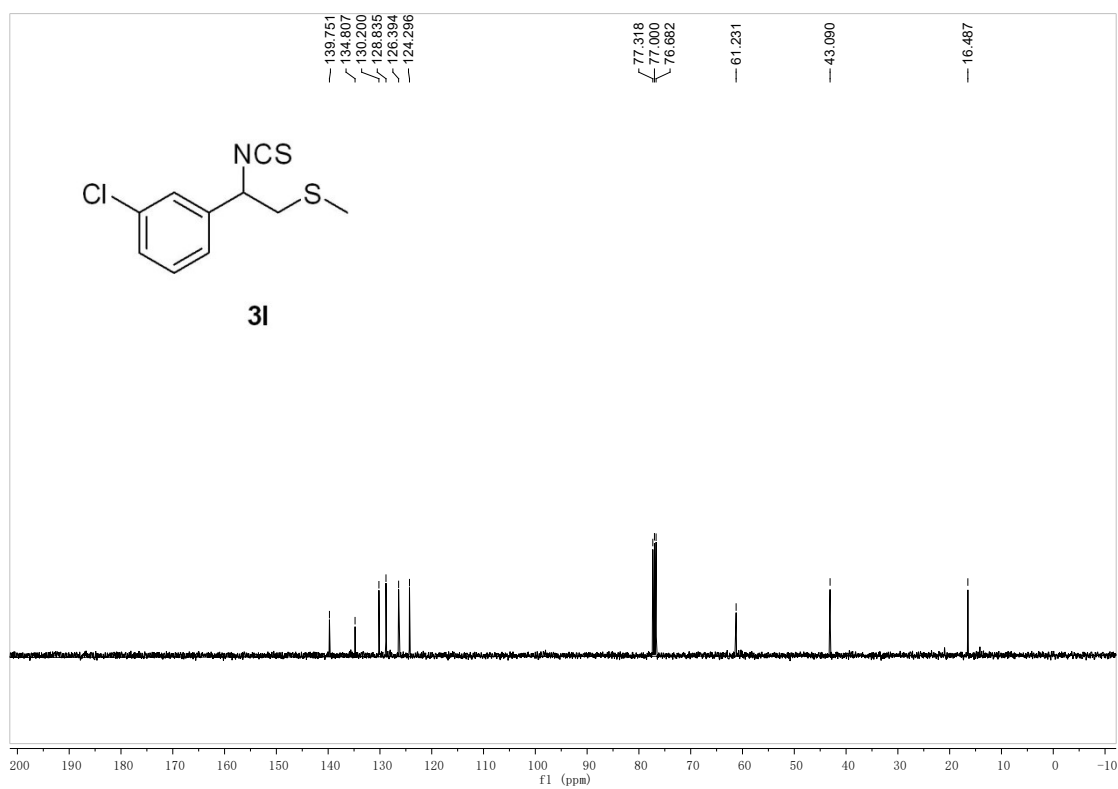

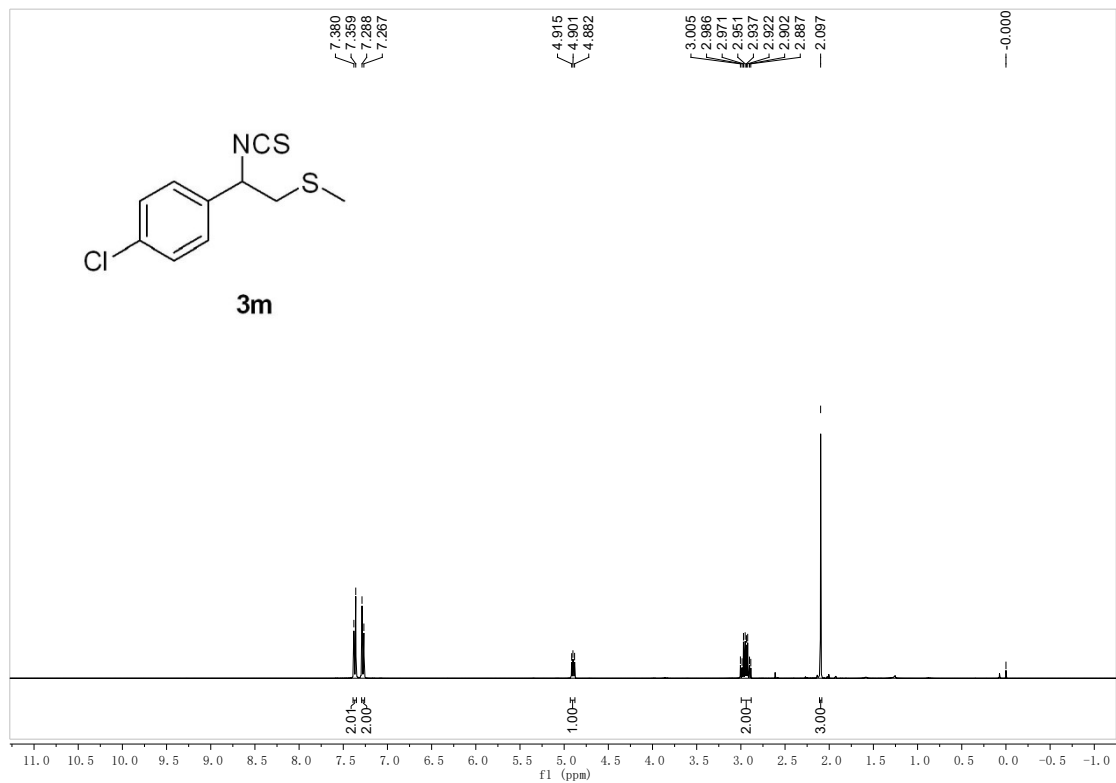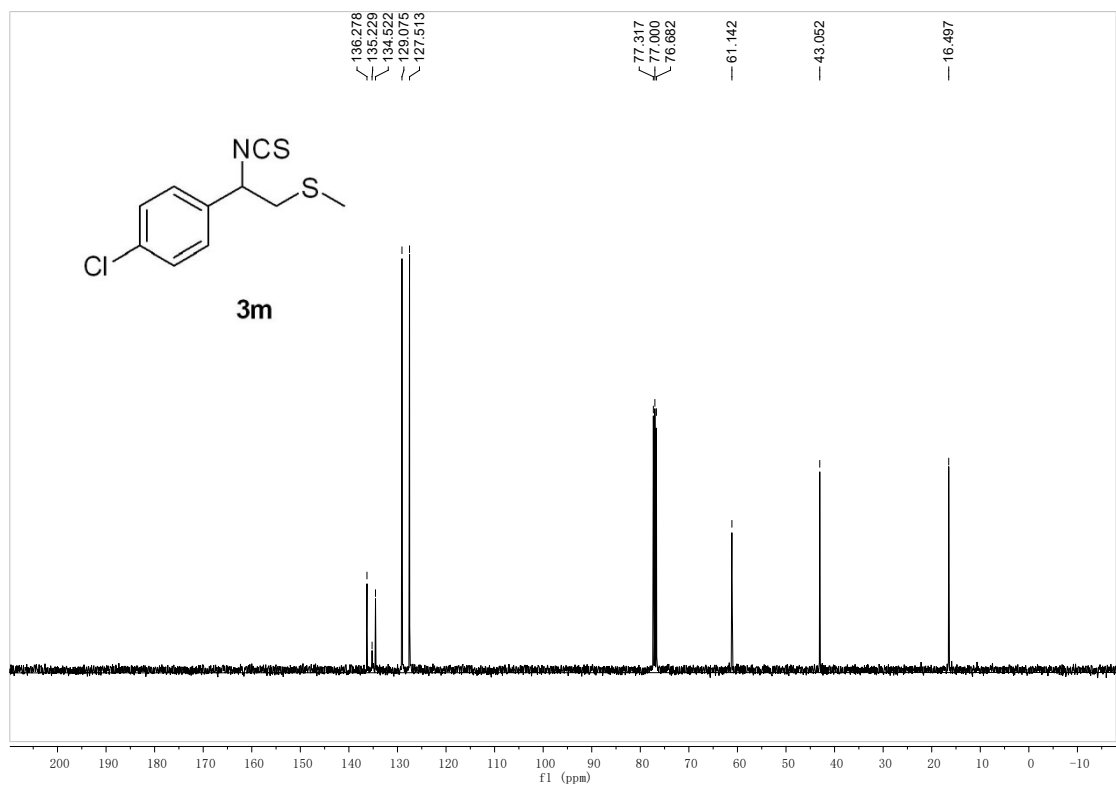

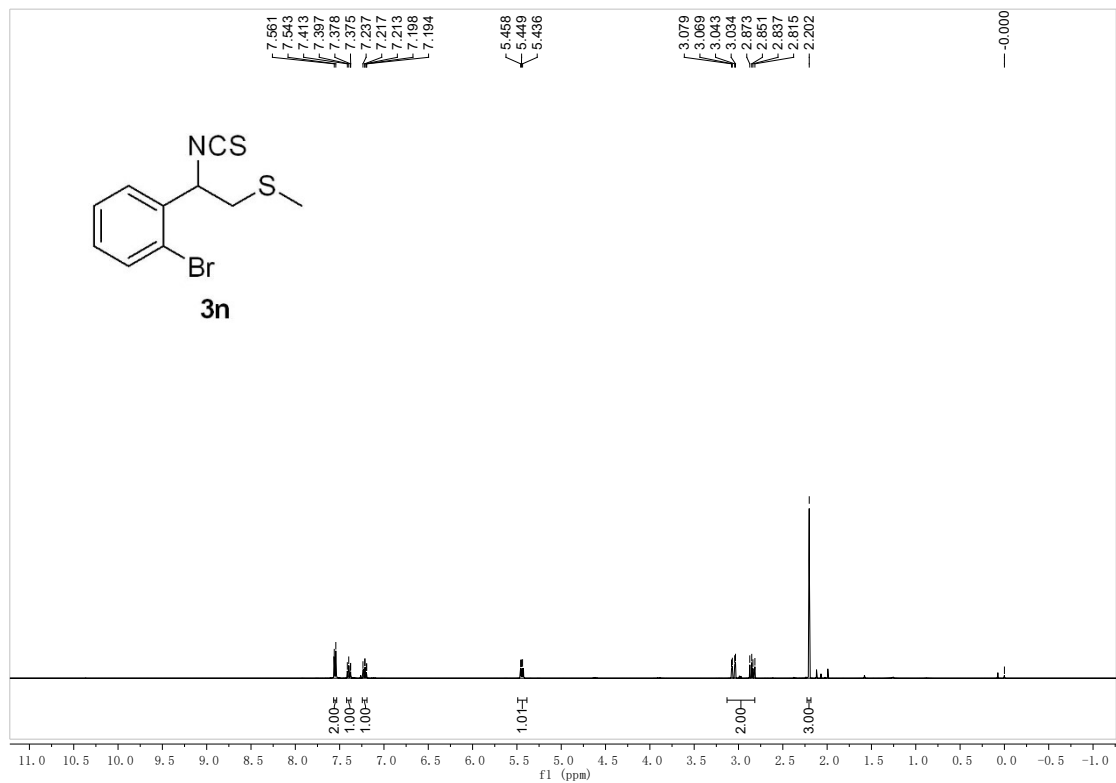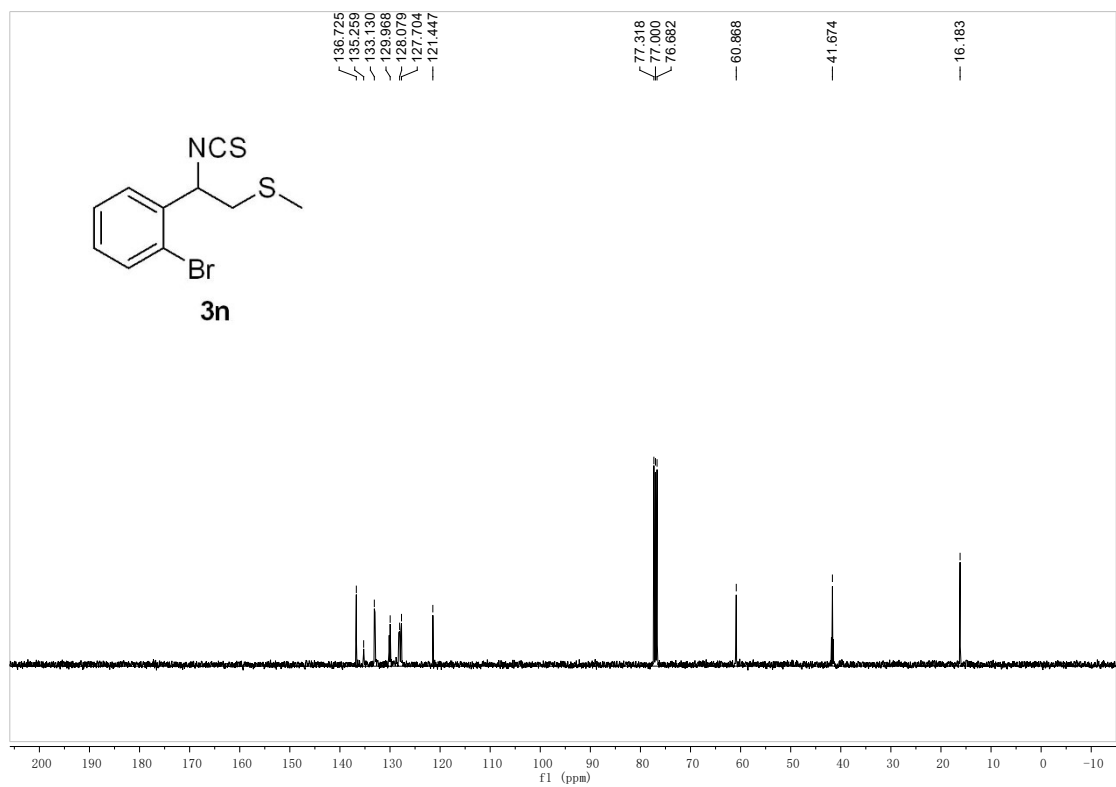

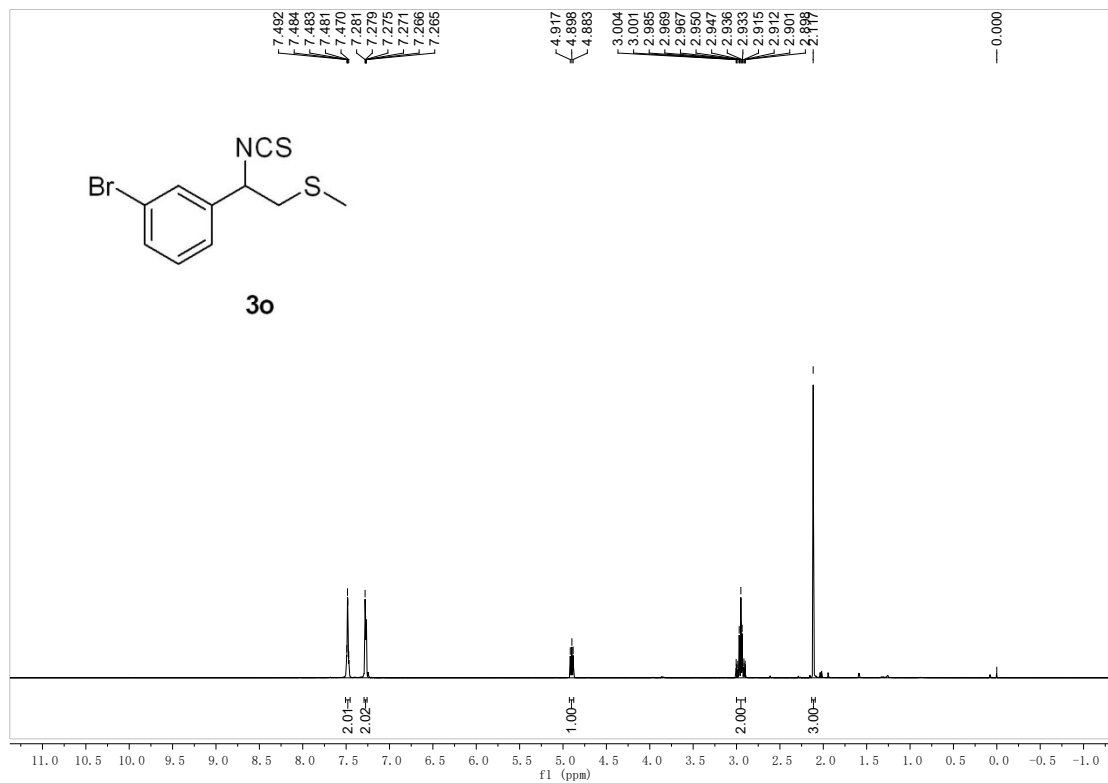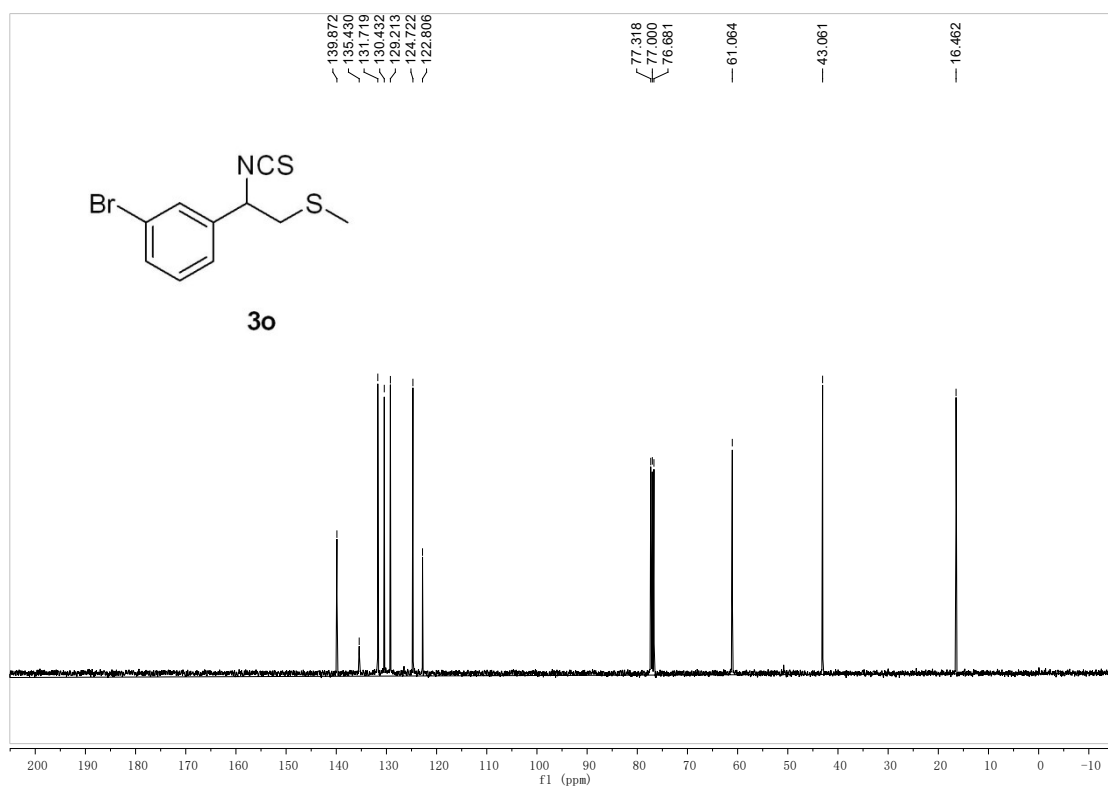



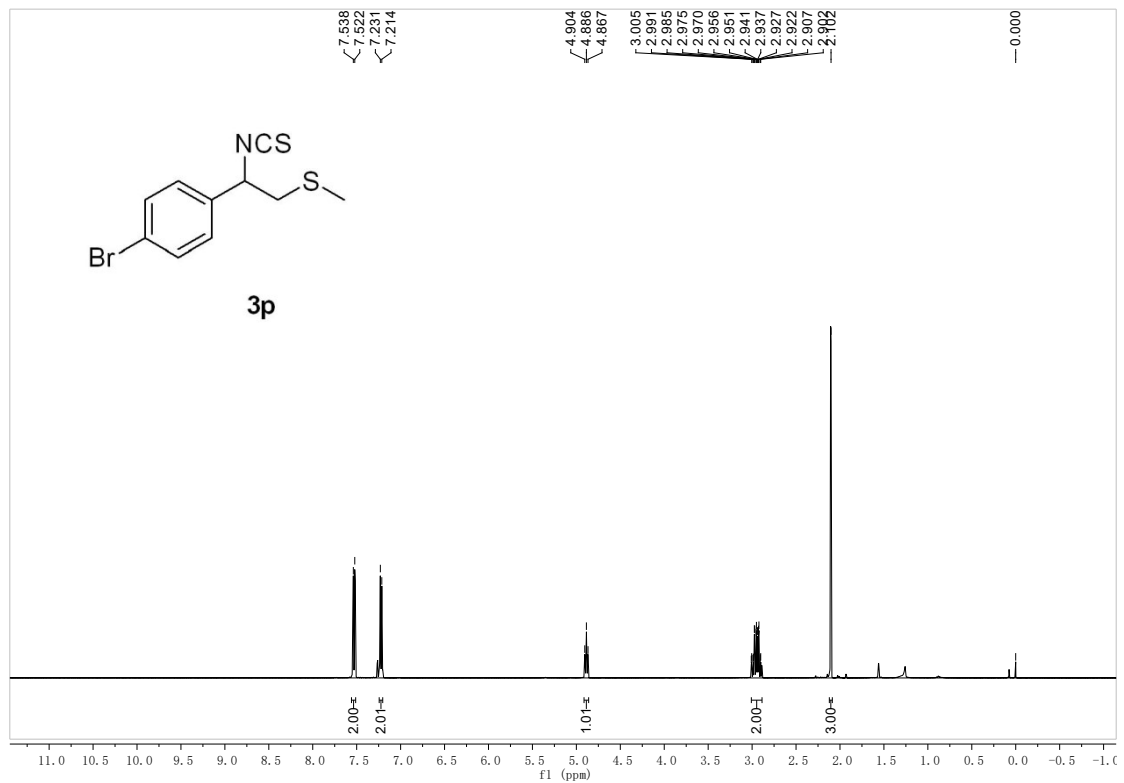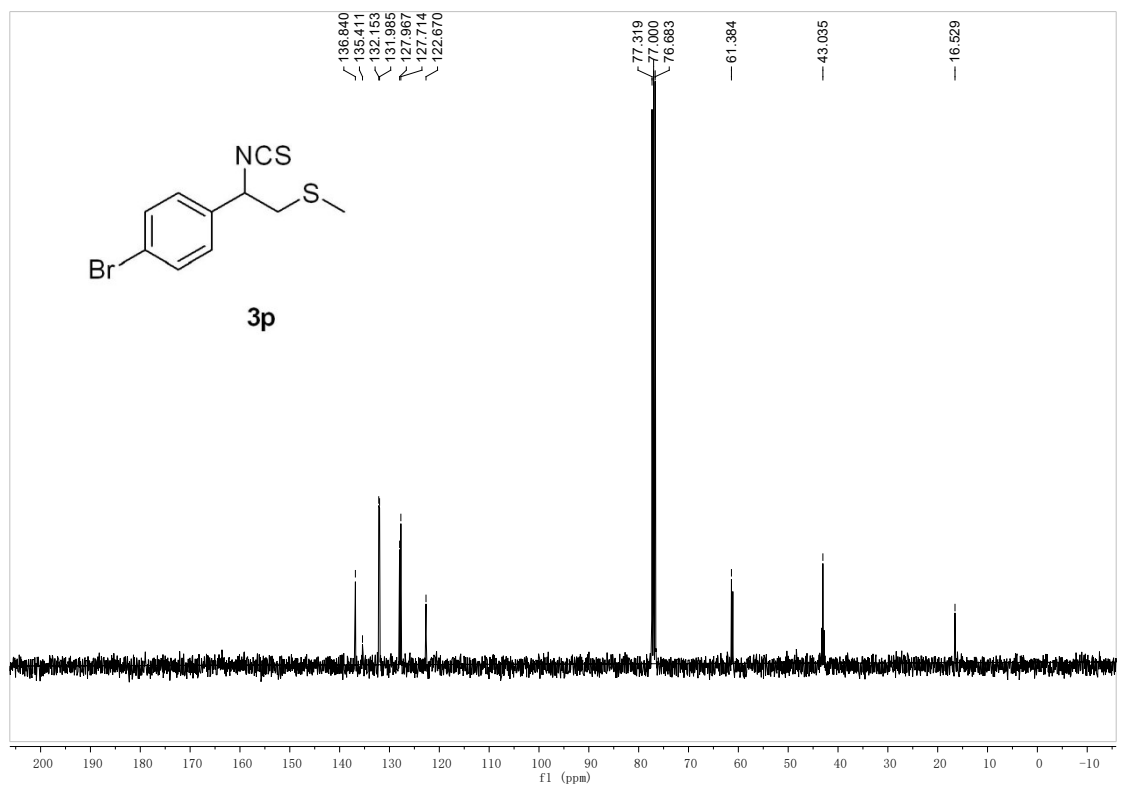

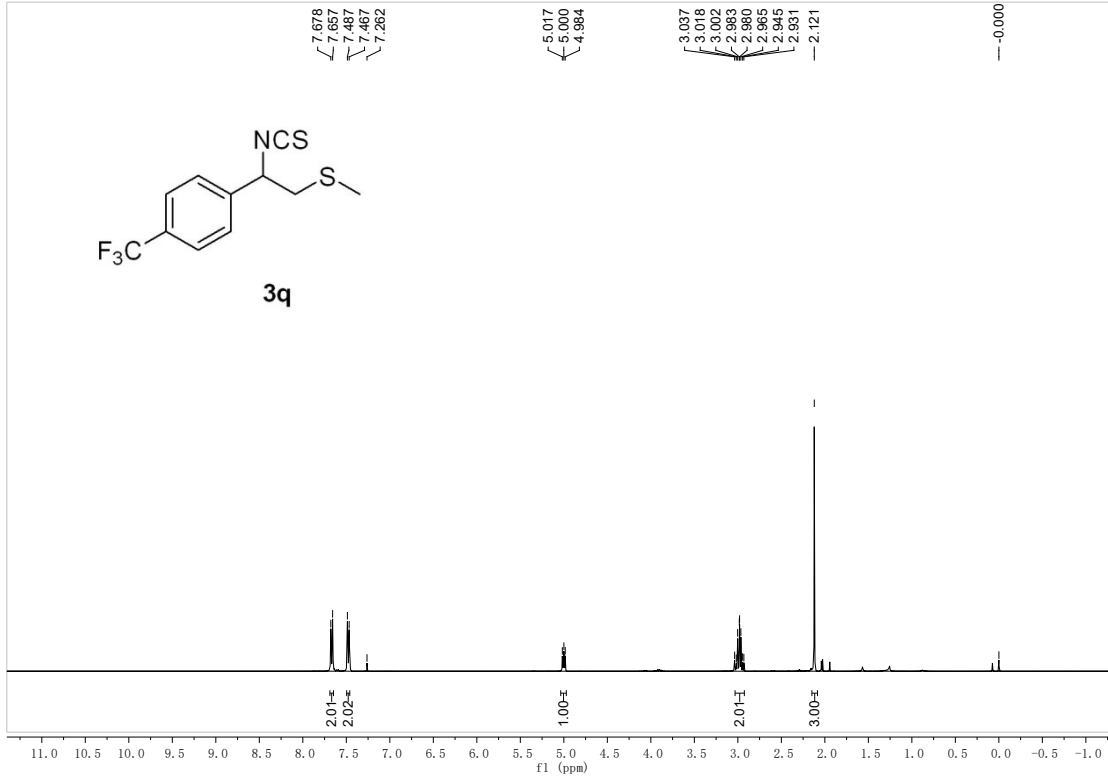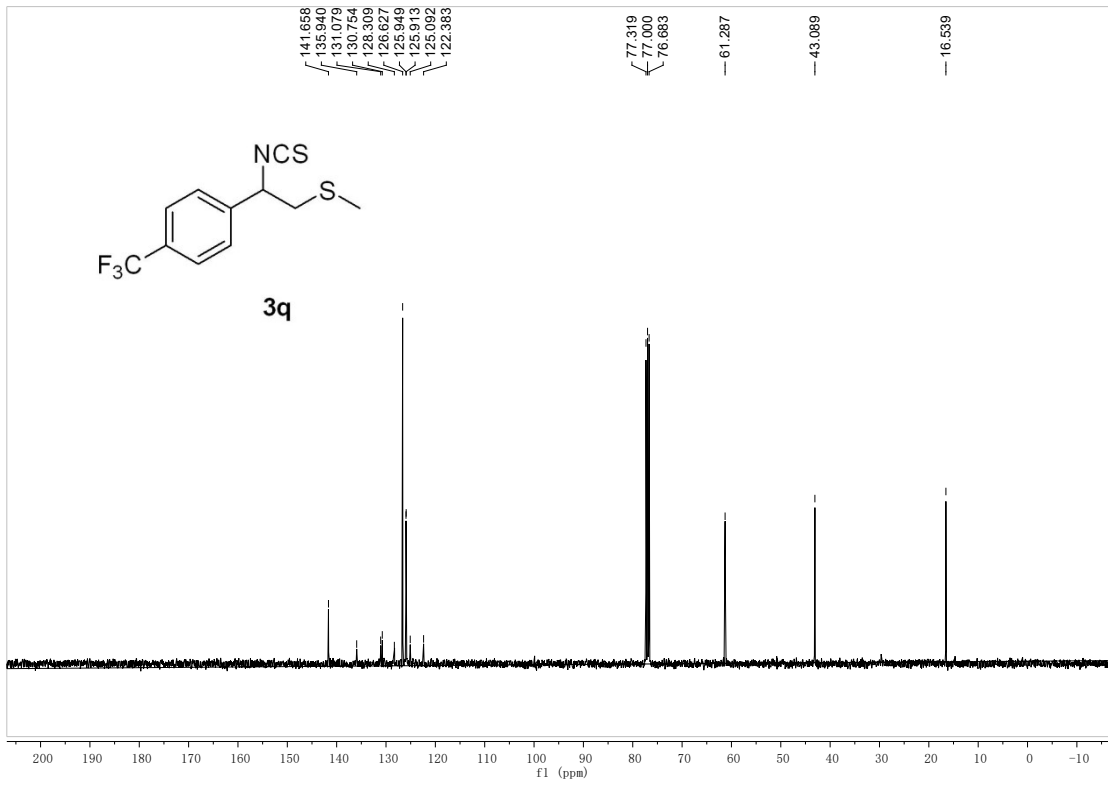

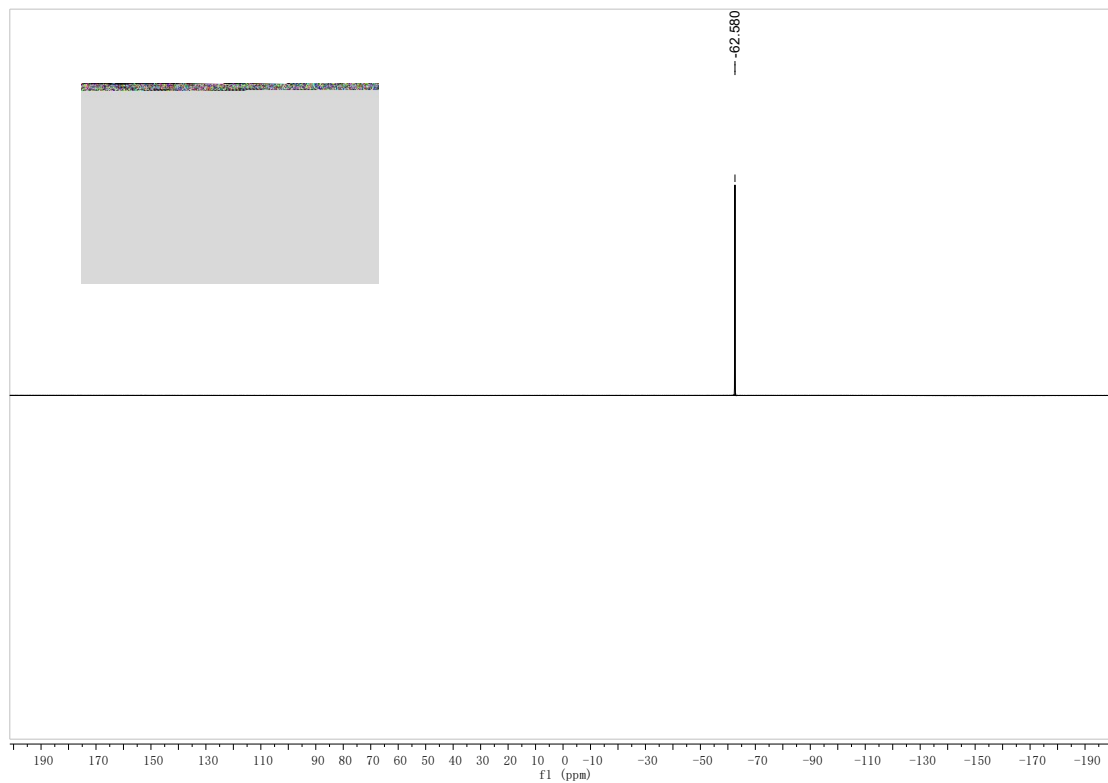

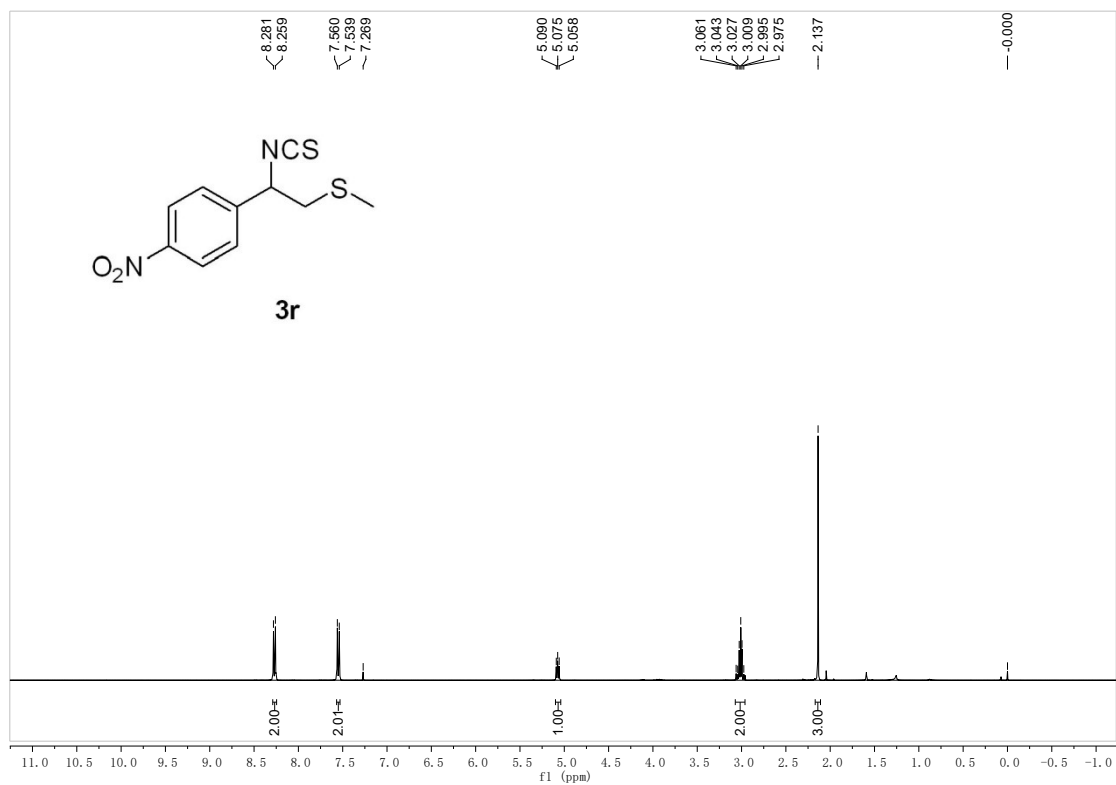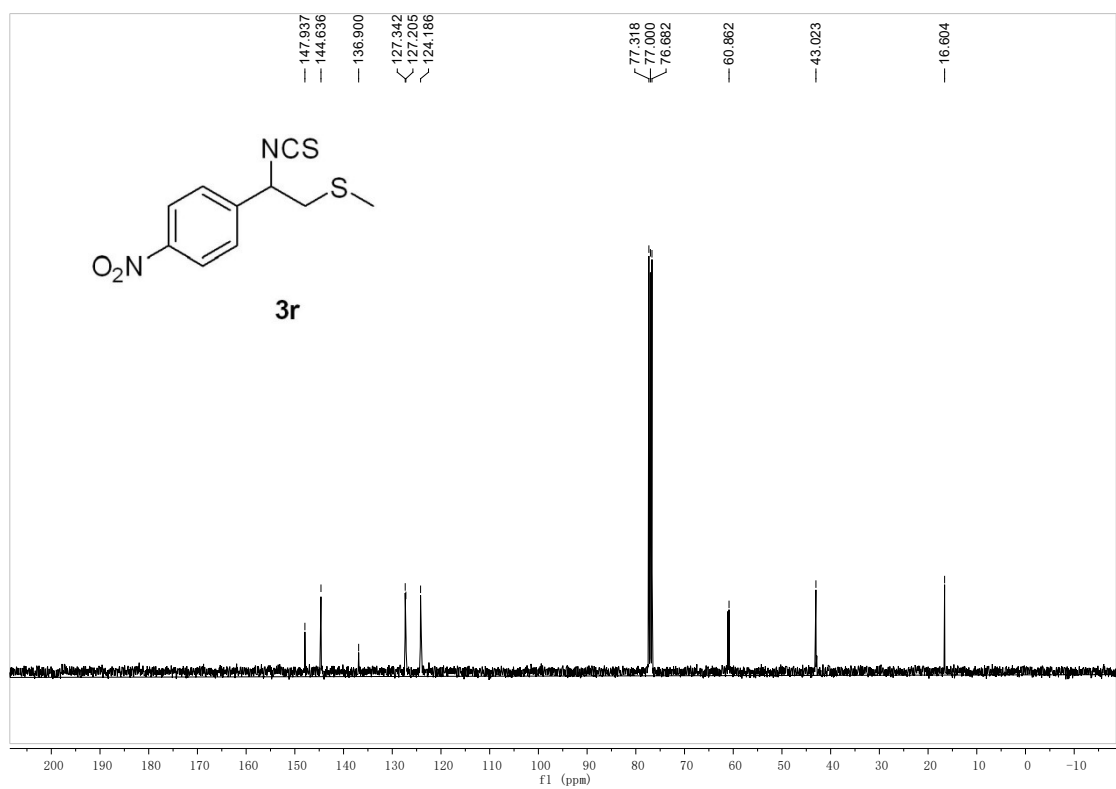

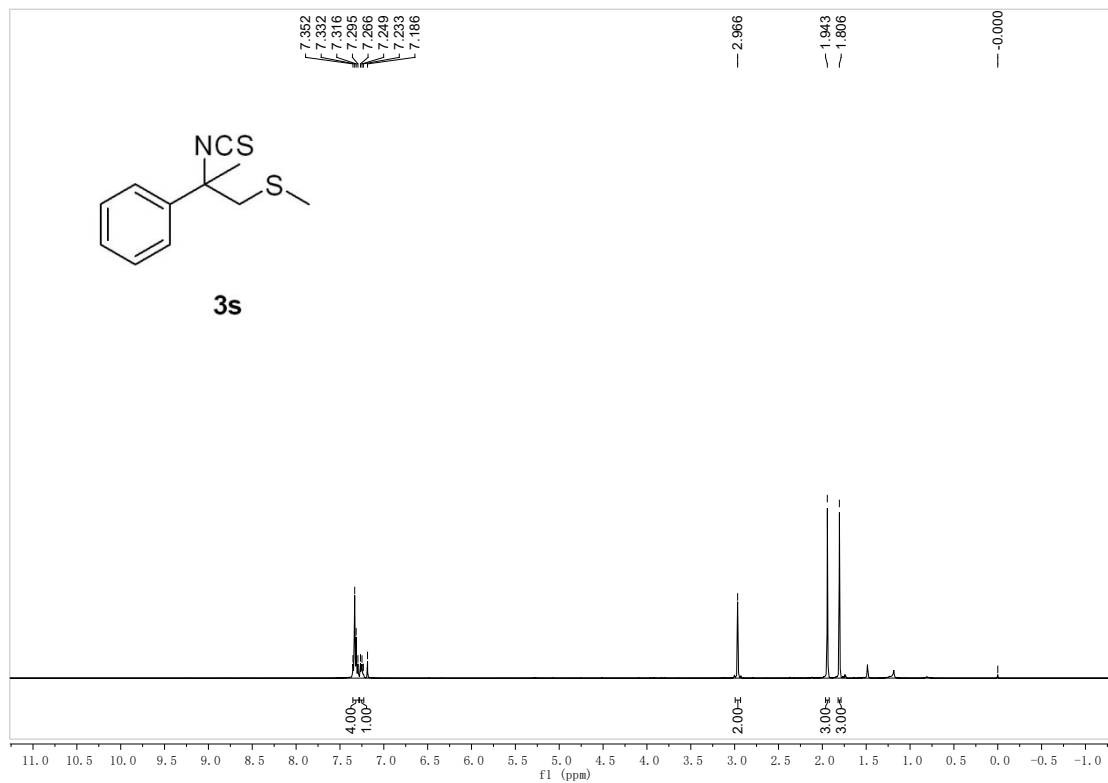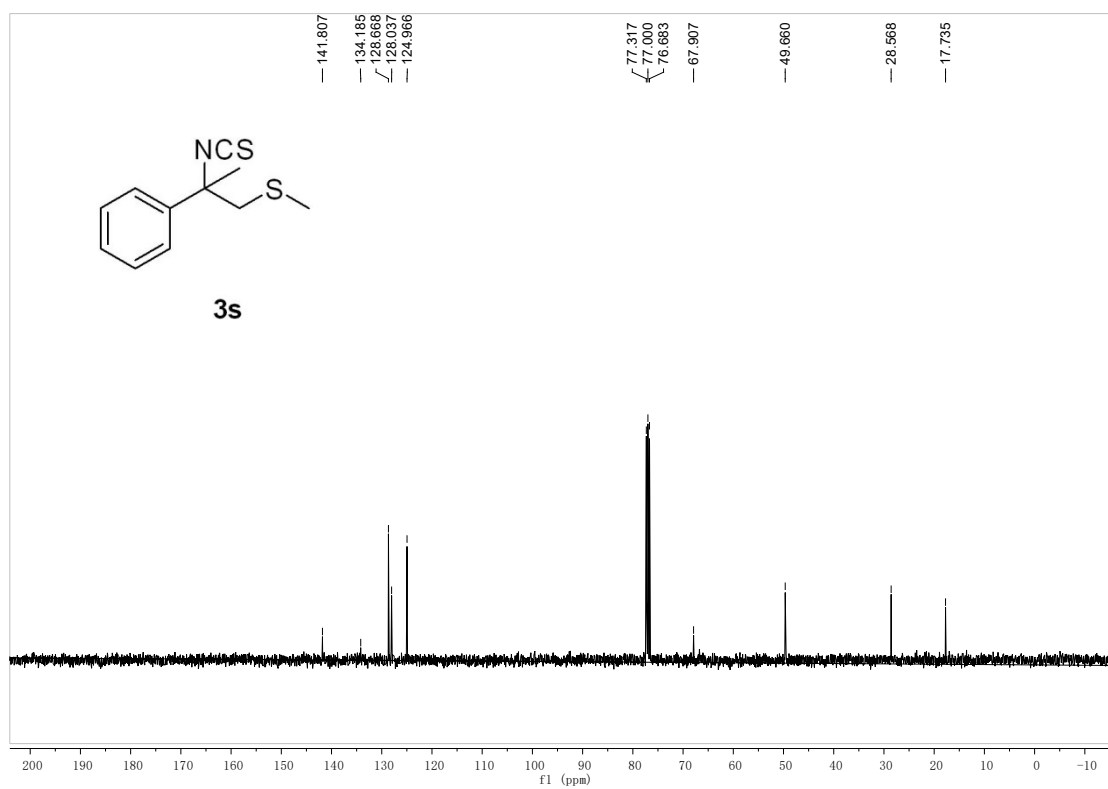

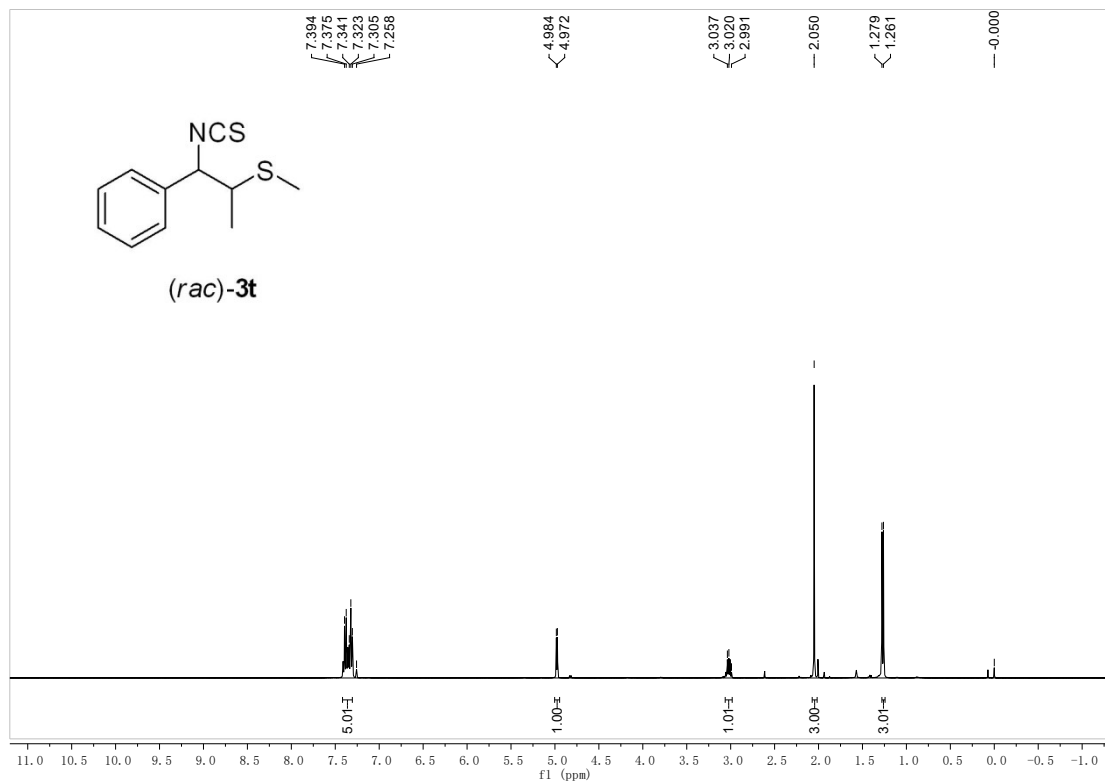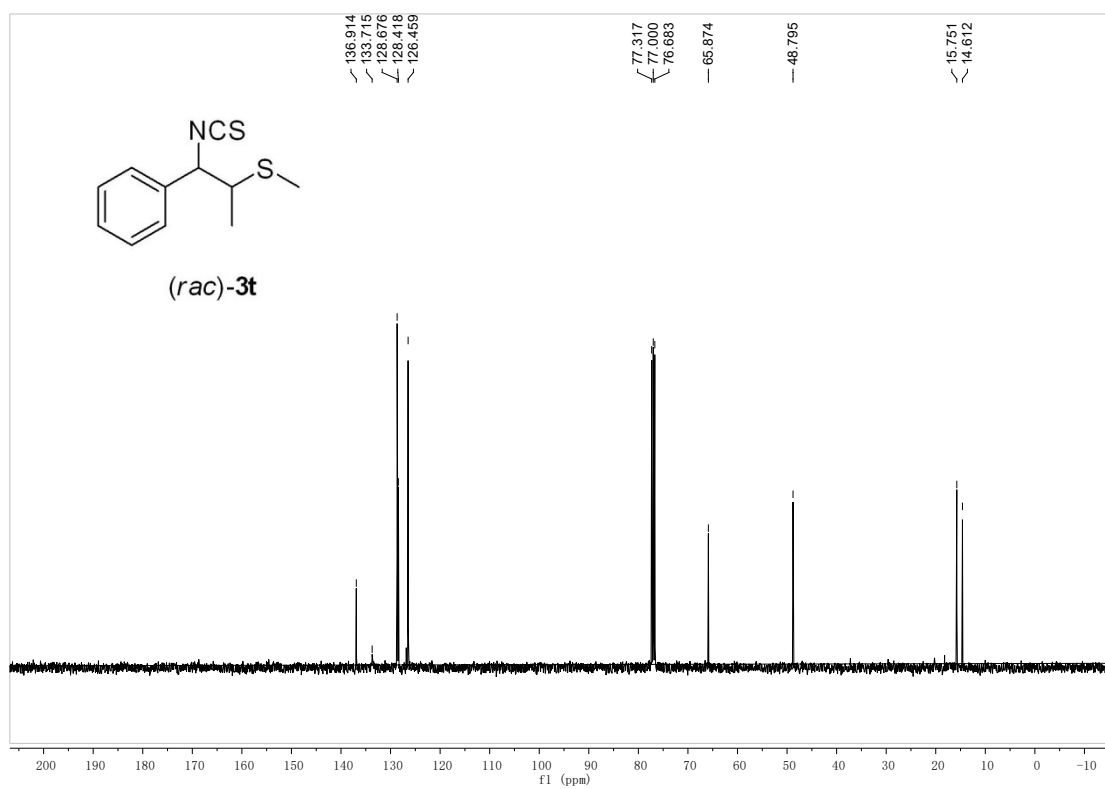

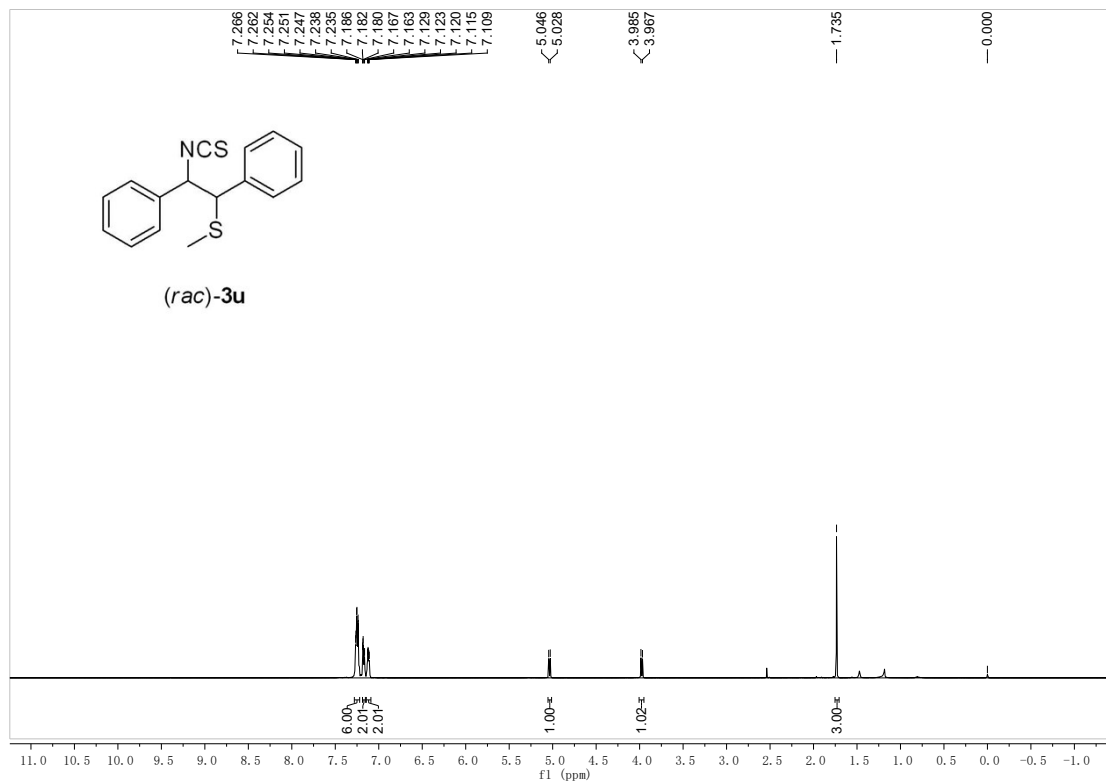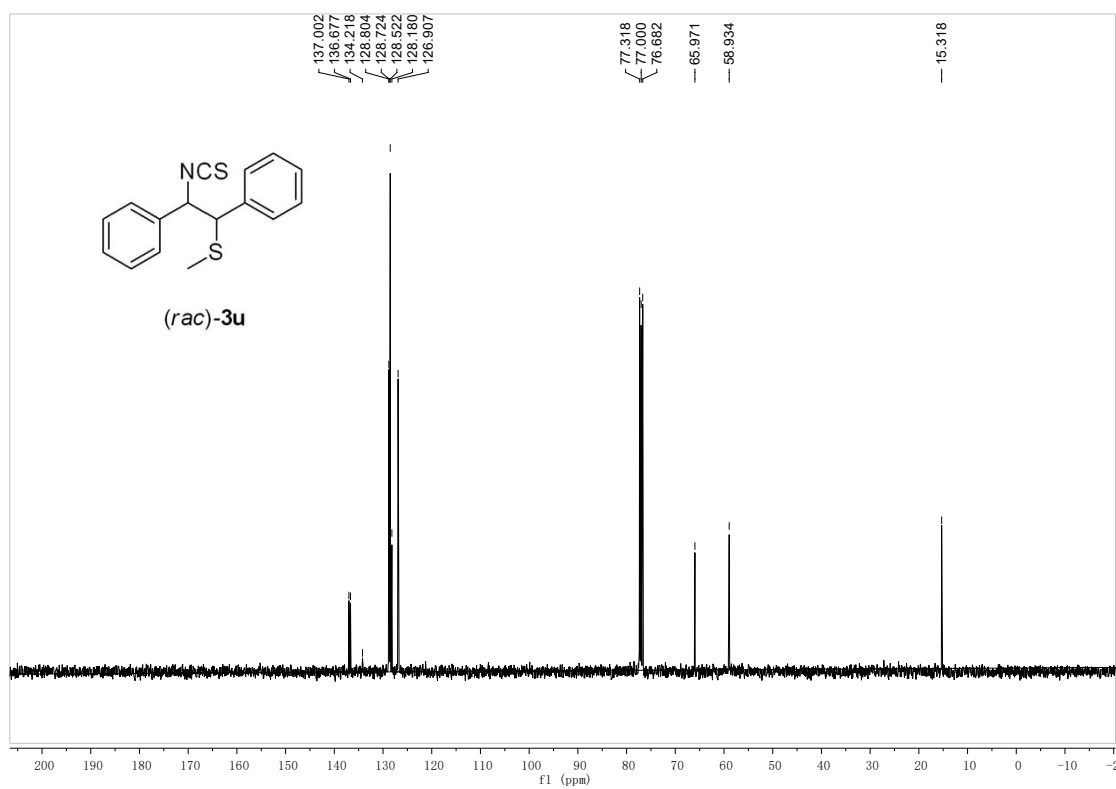

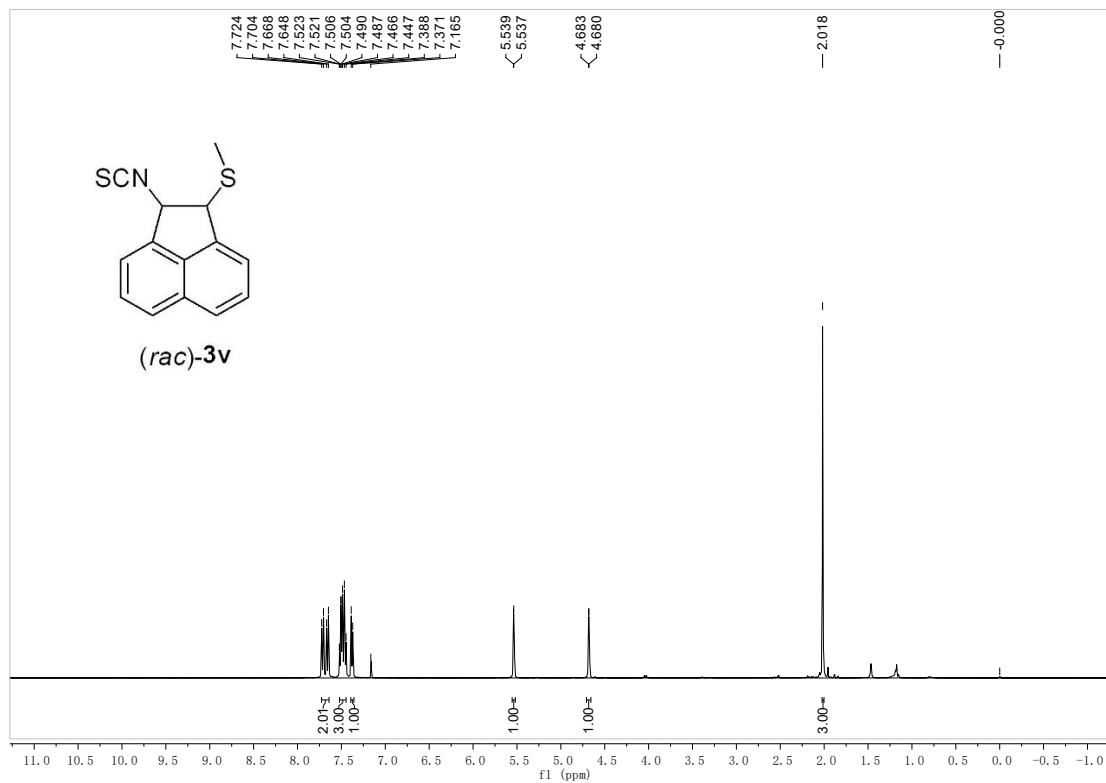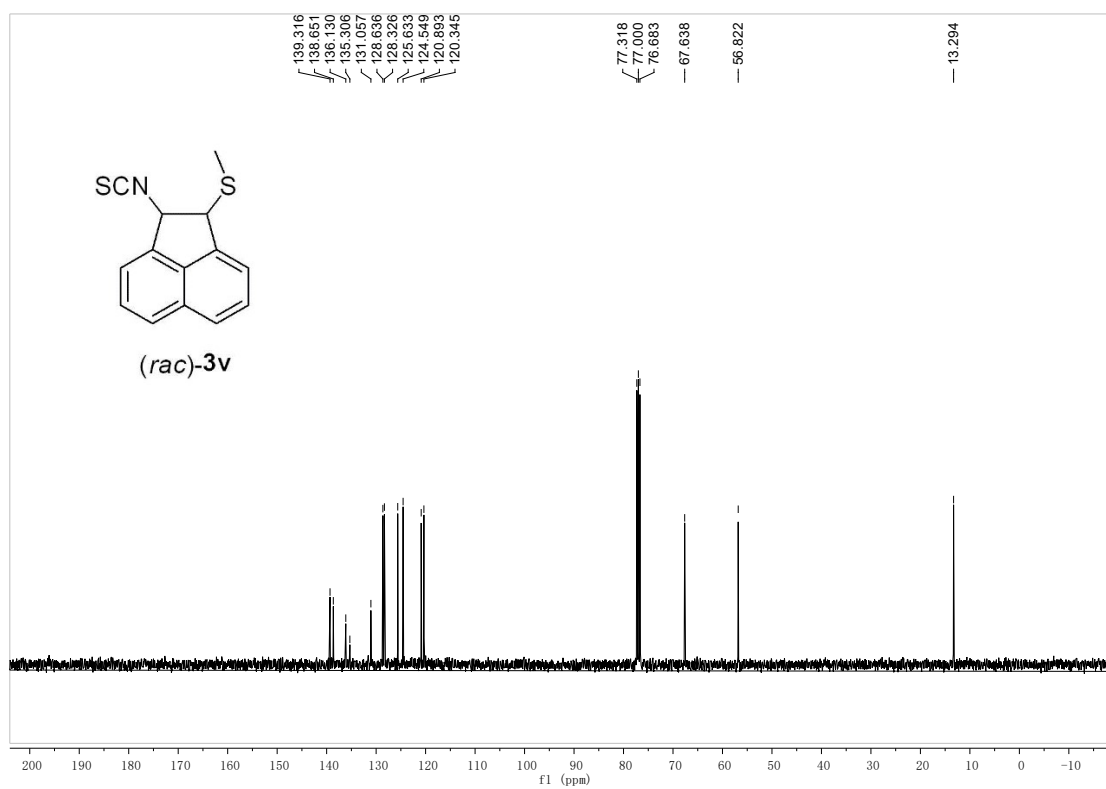



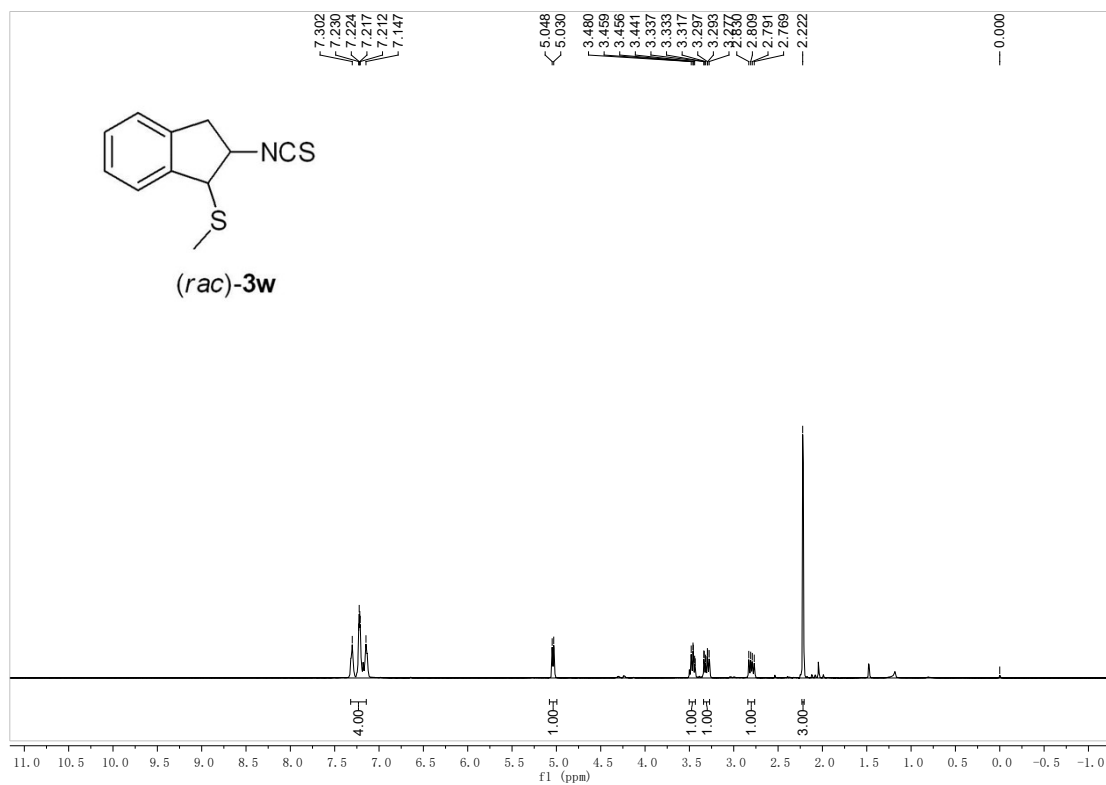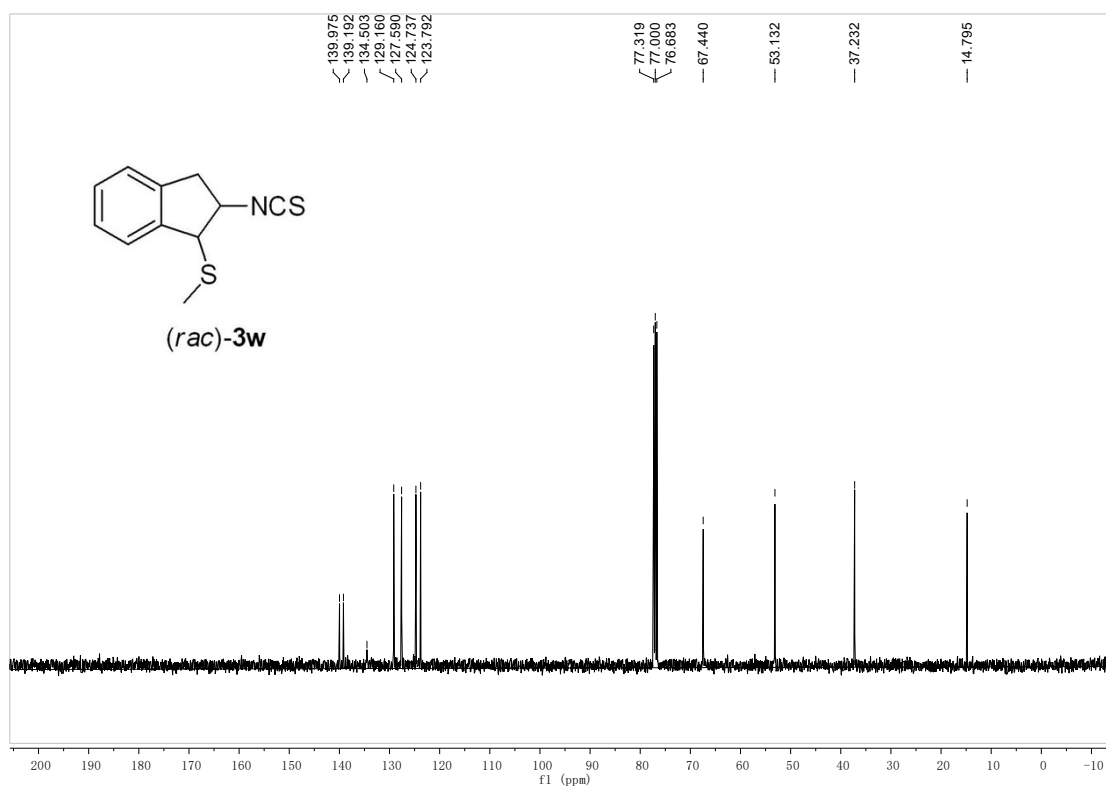

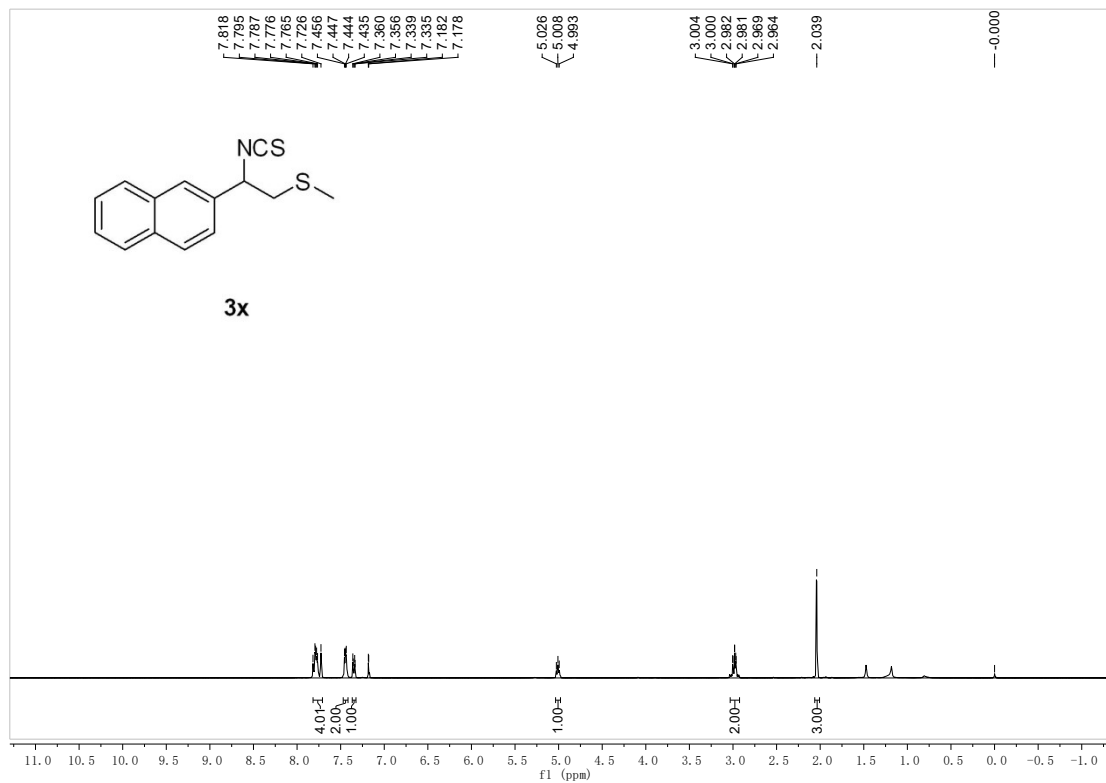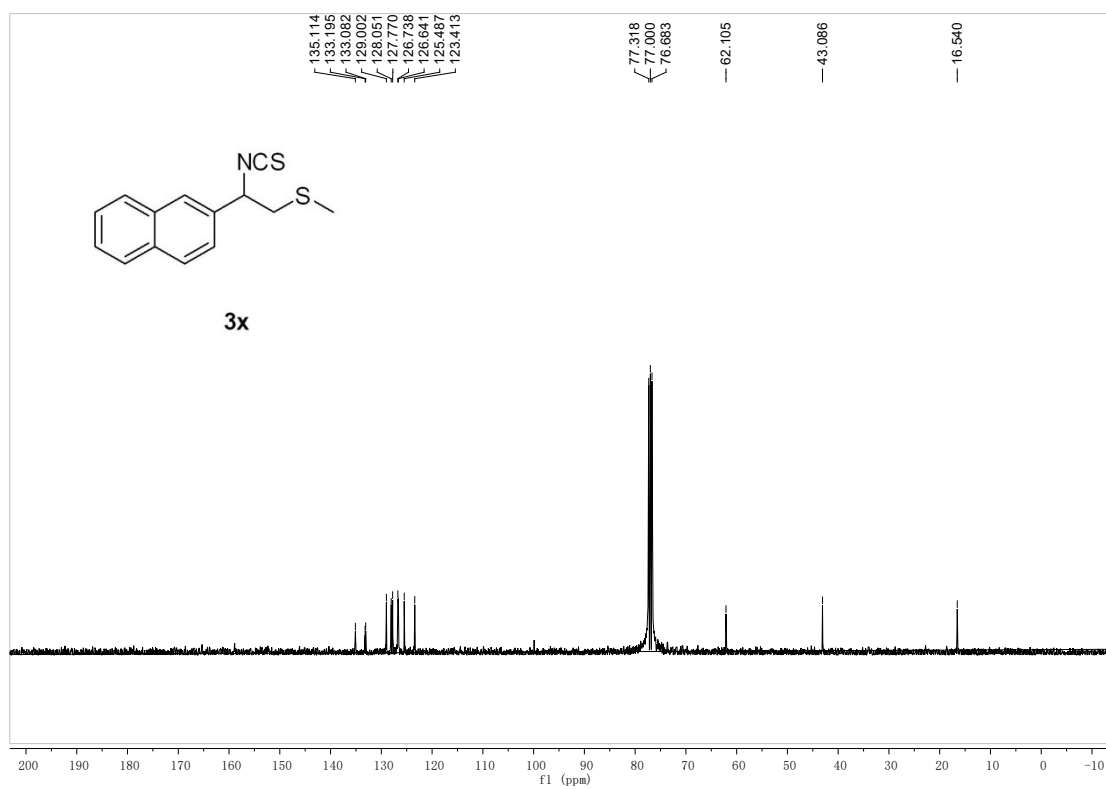

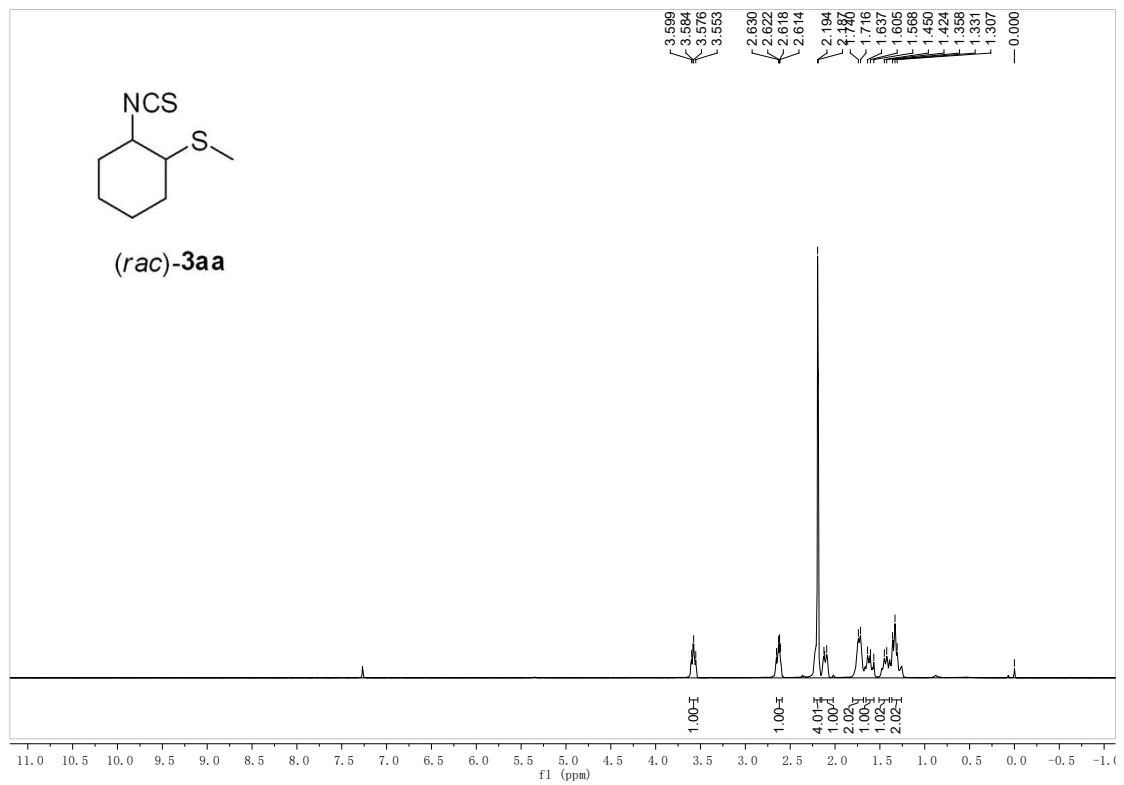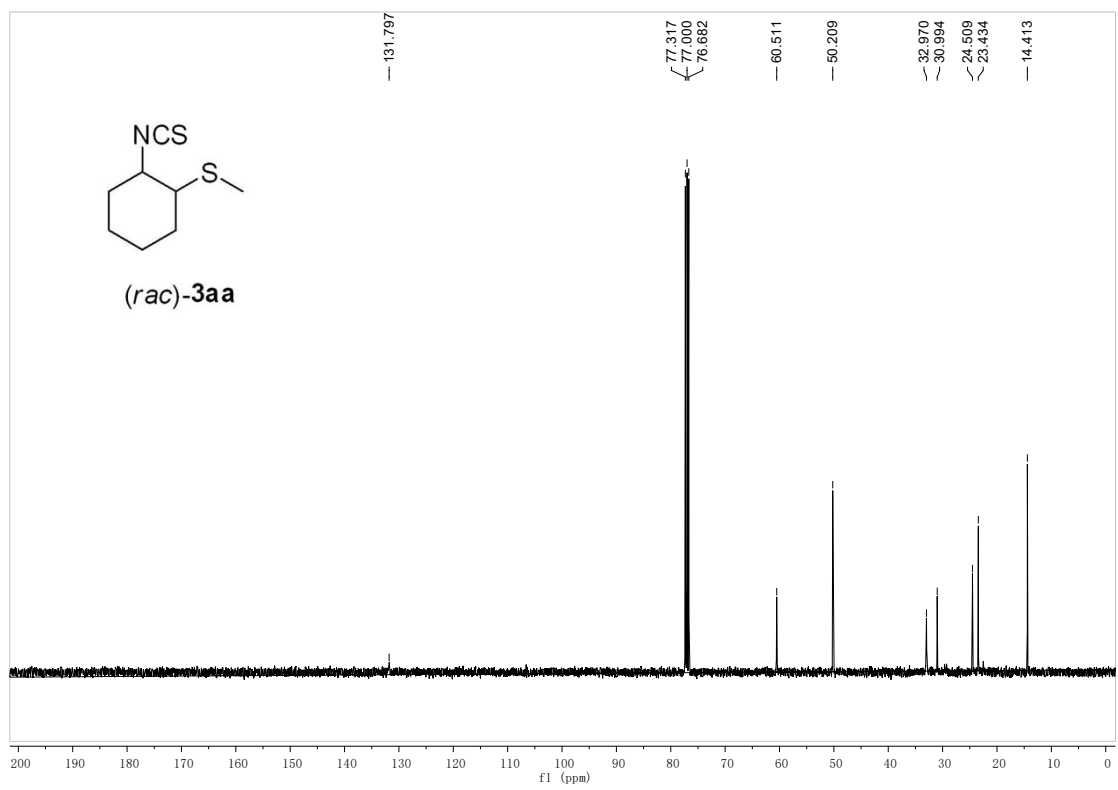

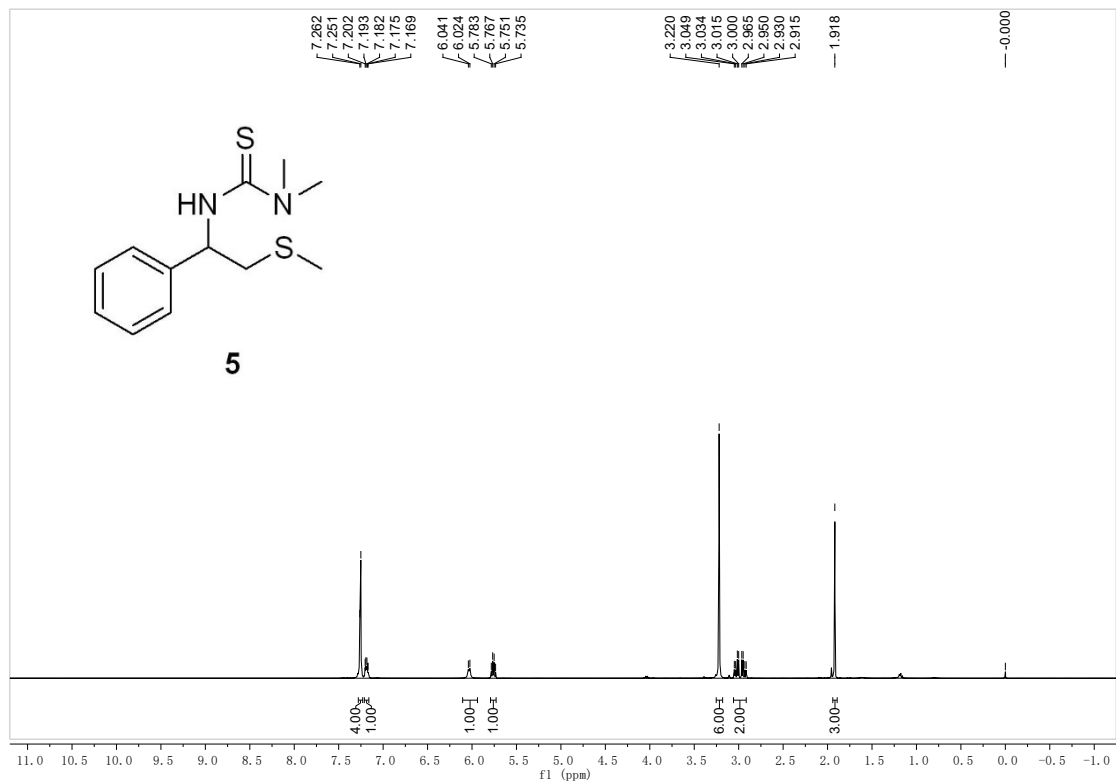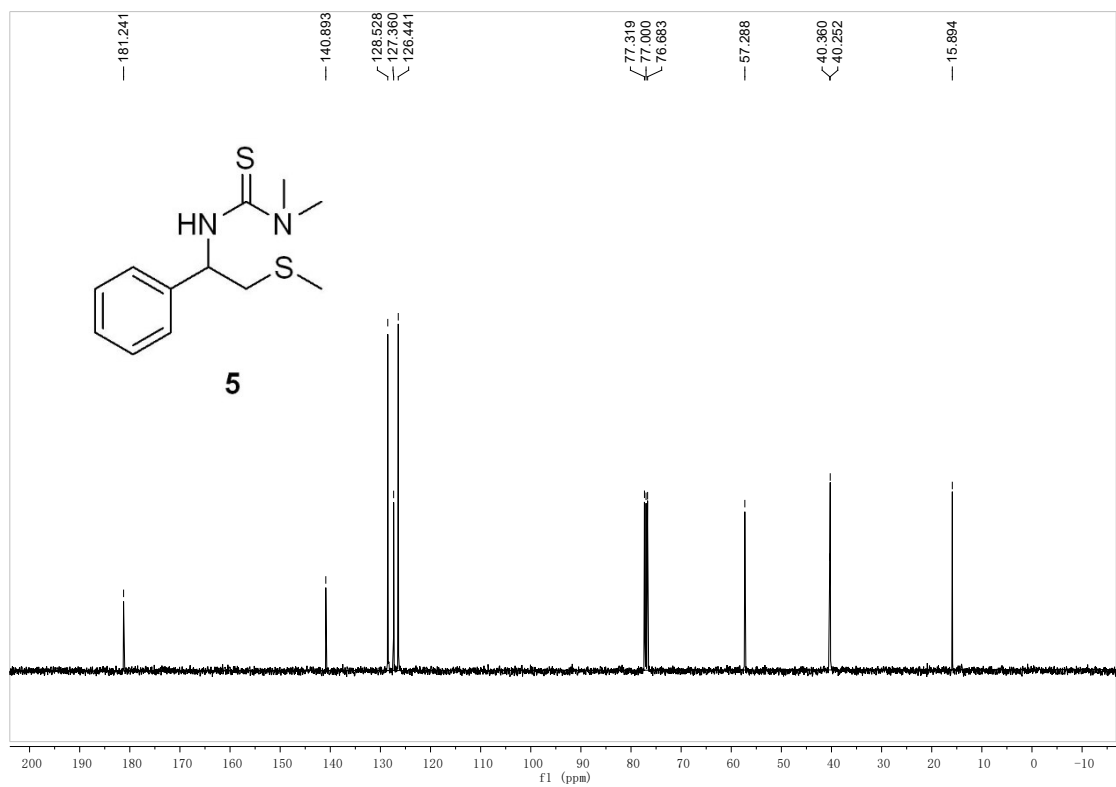

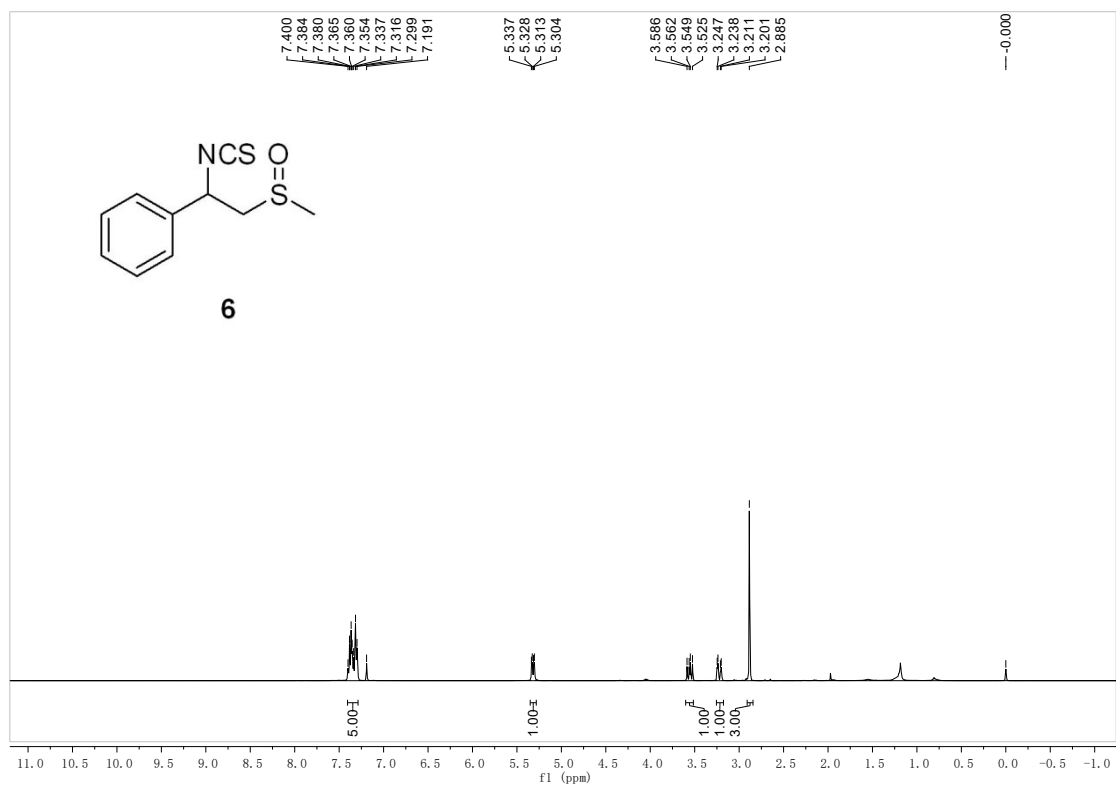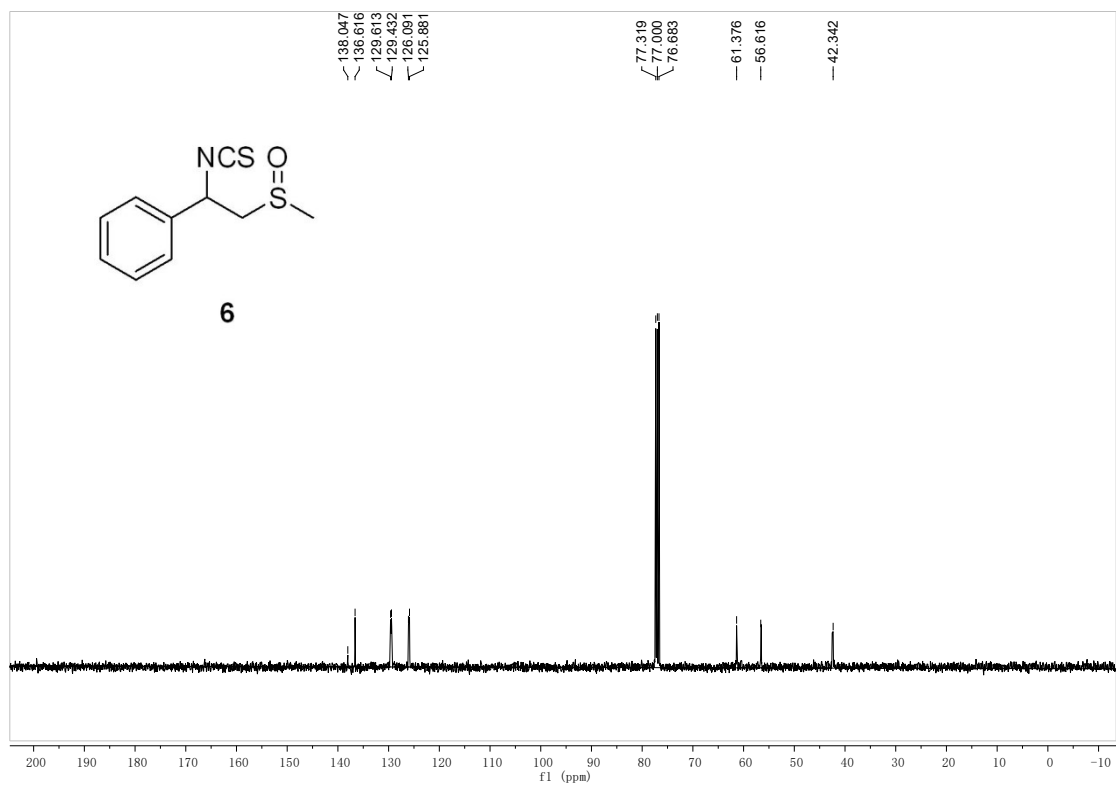

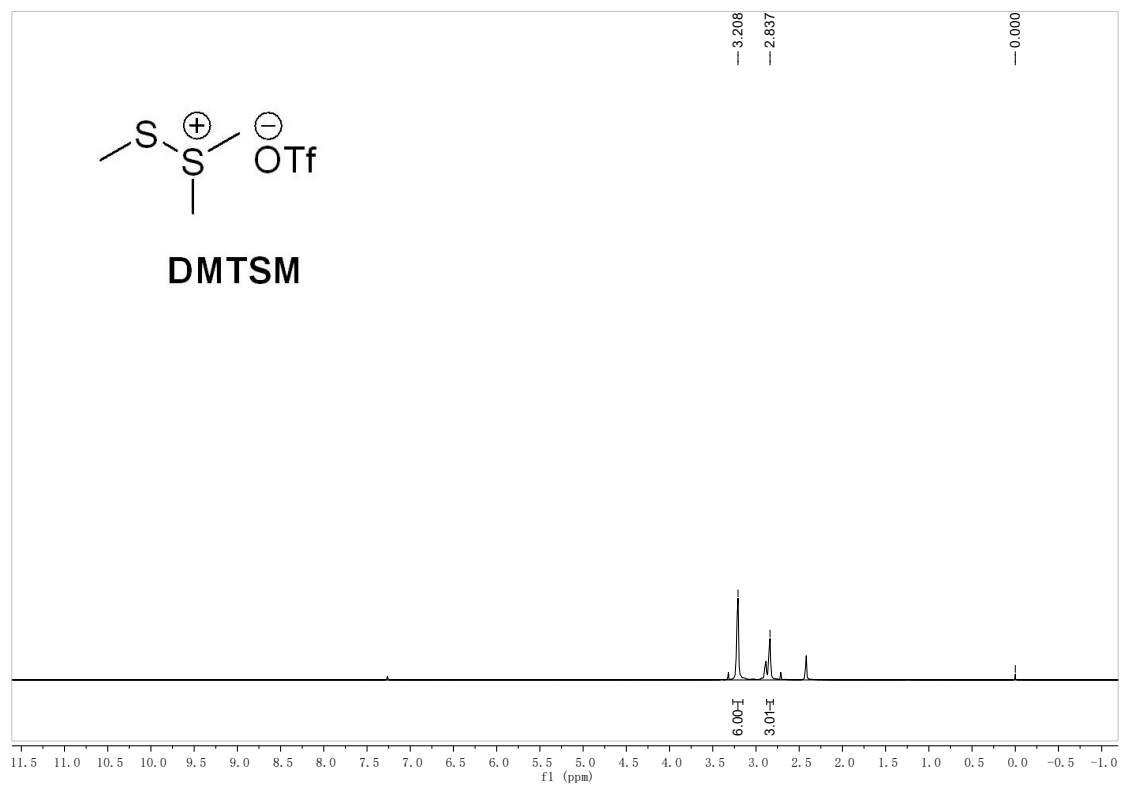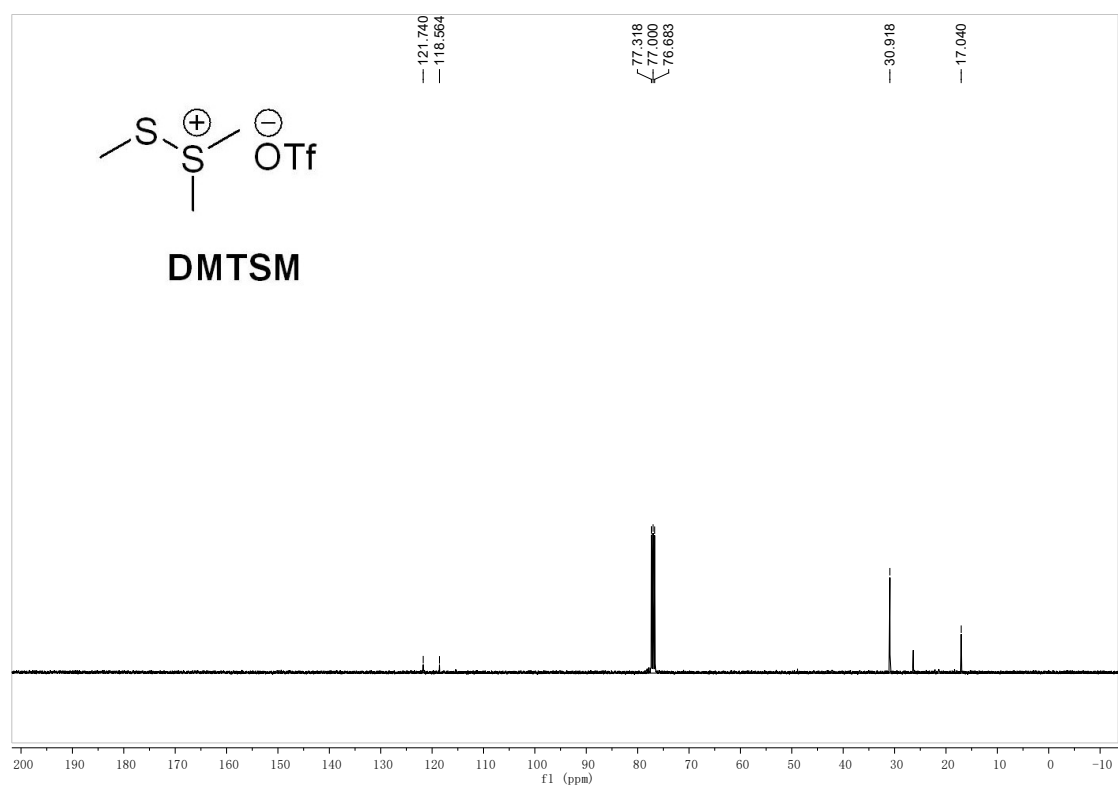

Supplement: d4ob00487f1.pdf [file d4ob00487f1.pdf]
